1 ***Plasmodium* sporozoites require the protein B9 to invade hepatocytes**

2

3 Priyanka Fernandes<sup>1</sup>, Manon Loubens<sup>1</sup>, Carine Marinach<sup>1</sup>, Romain Coppée<sup>2#</sup>,  
4 Morgane Grand<sup>1</sup>, Thanh-Phuc Andre<sup>1</sup>, Soumia Hamada<sup>1,3</sup>, Anne-Claire Langlois<sup>1</sup>,  
5 Sylvie Briquet<sup>1</sup>, Philippe Bun<sup>4</sup>, Olivier Silvie<sup>1</sup>

6

7 <sup>1</sup>Sorbonne Université, INSERM, CNRS, Centre d'Immunologie et des Maladies  
8 Infectieuses, CIMI-Paris, Paris, France

9 <sup>2</sup>Université de Paris, UMR 261 MERIT, IRD, F-75006, Paris, France

10 <sup>3</sup>Sorbonne Université, INSERM, UMS PASS, Plateforme Post-génomique de la Pitié  
11 Salpêtrière (P3S), 75013, Paris, France

12 <sup>4</sup>INSERM U1266, Neurlmag Facility, Institute of Psychiatry and Neurosciences of  
13 Paris, Paris, France

14

15 Running head: B9 is essential for sporozoite entry into hepatocytes

16

17

18 Correspondence to Olivier Silvie, [olivier.silvie@inserm.fr](mailto:olivier.silvie@inserm.fr).

19

20 #Current affiliation: Université de Paris, Infection Modelisation Antimicrobial Evolution  
21 (IAME), Inserm UMR1137, F-75018 Paris, France.

22

23

24

25 Key words: *Plasmodium* sporozoites; malaria; hepatocyte; invasion; B9 protein; beta-  
26 propeller domain.

27

28

29 **ABSTRACT**

30 *Plasmodium* sporozoites are transmitted to a mammalian host during blood feeding by  
31 an infected mosquito and invade hepatocytes for initial replication of the parasite in the  
32 liver. This leads to the release of thousands of merozoites into the blood circulation  
33 and initiation of the pathogenic blood stages of malaria. Merozoite invasion of  
34 erythrocytes has been well characterized at the molecular and structural levels. In  
35 sharp contrast, the molecular mechanisms of sporozoite invasion of hepatocytes are  
36 poorly characterized. Here we report a new role during sporozoite entry for the B9  
37 protein, a member of the 6-cysteine domain protein family. Using genetic tagging and  
38 gene deletion approaches in rodent malaria parasites, we show that B9 is secreted  
39 from sporozoite micronemes and is required for productive invasion of hepatocytes.  
40 Structural modelling indicates that the N-terminus of B9 forms a beta-propeller domain  
41 structurally related to CyRPA, a cysteine-rich protein forming an invasion complex with  
42 Rh5 and RIPR in *P. falciparum* merozoites. We provide evidence that the beta-  
43 propeller domain of B9 is essential for protein function during sporozoite entry and  
44 interacts with P36 and P52, both also essential for productive invasion of hepatocytes.  
45 Our results suggest that, despite using distinct sets of parasite and host entry factors,  
46 *Plasmodium* sporozoites and merozoites may share common structural modules to  
47 assemble protein complexes for invasion of host cells.

48

49

## 50 INTRODUCTION

51 Malaria is caused by *Plasmodium* spp. parasites and still remains a major health  
52 and socio-economic problem in endemic countries<sup>1</sup>. Sporozoites, the mosquito-  
53 transmitted forms of the malaria parasite, first infect the liver for an initial and obligatory  
54 round of replication, before initiating the symptomatic blood stages. Infection of the  
55 liver is clinically silent and constitutes an ideal target for a malaria vaccine. Until now,  
56 only one single antigen, the circumsporozoite protein (CSP), had been considered for  
57 clinical vaccine development against the extracellular sporozoite stage, with limited  
58 success<sup>2</sup>. Other sporozoite antigens, especially parasite proteins involved in host-  
59 parasite interactions, could be considered as potential vaccine targets to prevent  
60 sporozoite entry into hepatocytes. This highlights the need to better characterize the  
61 molecular mechanisms of sporozoite infection in order to identify new vaccine targets.

62 Like other Apicomplexan parasites, *Plasmodium* invades host cells using a  
63 unique mechanism that involves the sequential secretion of apical organelles, called  
64 micronemes and rhoptries, and the formation of a moving junction (MJ) through which  
65 the parasite actively glides to enter the cell and form a specialized parasitophorous  
66 vacuole (PV) where it further replicates<sup>3</sup>. Proteins released from micronemes onto the  
67 parasite surface are prime candidates to interact with host cell surface receptors,  
68 triggering subsequent secretion of the rhoptry content, formation of the MJ and  
69 commitment to productive invasion. However, until now the ligand-receptor  
70 interactions mediating *Plasmodium* sporozoite invasion and the nature of the  
71 sporozoite MJ have remained enigmatic<sup>4</sup>.

72 We previously characterized host entry pathways used by human (*P. falciparum*,  
73 *P. vivax*) and rodent (*P. yoelii*, *P. berghei*) parasites to infect hepatocytes<sup>5,6</sup>, and  
74 showed that CD81 and SR-BI define independent entry routes for *P. falciparum* and  
75 *P. vivax* sporozoites, respectively<sup>6</sup>. Remarkably, this alternative usage of host cell  
76 receptors is also observed with rodent malaria model parasites, providing robust and  
77 tractable experimental systems<sup>6,7</sup>. Indeed, *P. yoelii* sporozoites, like *P. falciparum*,

78 strictly require CD81 to infect liver cells, whereas *P. berghei* can alternatively use CD81  
79 or SR-BI for productive invasion<sup>6</sup>. Only two parasite proteins, P36 and P52, have been  
80 identified as being specifically required for productive invasion of hepatocytes<sup>6,8-11</sup>.  
81 Using inter-species genetic complementation in mutant *P. berghei* and *P. yoelii* lines,  
82 we showed that P36 is a key determinant of host cell receptor usage, establishing for  
83 the first time a functional link between sporozoite and host cell entry factors<sup>6</sup>. The  
84 molecular function of P36 remains unknown. One study proposed that P36 interacts  
85 with the ephrin receptor EphA2 on hepatocytes to mediate infection<sup>12</sup>, but direct  
86 evidence for such an interaction is lacking, and EphA2 was later shown to be  
87 dispensable for sporozoite productive invasion<sup>13</sup>. Interestingly, interspecies genetic  
88 complementation experiments showed that *P. berghei*  $\Delta p52\Delta p36$  mutants  
89 complemented with PyP52 and PyP36 exhibit a *P. yoelii*-like phenotype as they  
90 preferentially infect CD81-expressing cells<sup>6</sup>. However, whilst *P. yoelii* sporozoites are  
91 unable to infect hepatocytes in the absence of CD81, complemented *P. berghei*  
92 mutants retain a residual invasion capacity in CD81-deficient cells<sup>6</sup>. Furthermore,  
93 genetic complementation with *P. falciparum* or *P. vivax* P52 and P36 cannot restore  
94 infection of  $\Delta p52\Delta p36$  *P. berghei* sporozoites<sup>6</sup>. These results strongly suggest that  
95 additional parasite factors contribute to receptor-dependent productive invasion.

96 P36 and P52 both belong to the so-called 6-cysteine domain protein family,  
97 which is characterized by the presence of one or several 6-cysteine (6-cys) domains<sup>14</sup>.  
98 6-cys domains are ~120 amino acid long domains containing four or six conserved  
99 cysteine residues that respectively form two or three disulphide bonds resulting in a  
100 beta-sandwich fold<sup>14</sup>. *Plasmodium* spp. possess 14 members of the 6-cys protein  
101 family<sup>15</sup>. *Plasmodium* 6-cys proteins are typically expressed in a stage-specific  
102 manner, and have been implicated in protein-protein interactions in *P. falciparum*  
103 merozoites<sup>16,17</sup>, gametocytes<sup>18,19</sup>, ookinetes<sup>20</sup> and sporozoites<sup>11</sup>. Proteomic studies  
104 have shown that, in addition to P36 and P52, *Plasmodium* sporozoites express three

105 other 6-cys proteins, P12p, P38 and B9<sup>21-24</sup>. While the contribution of P12p and P38  
106 had not been studied until now, a previous study reported that the protein B9 is not  
107 expressed in sporozoites due to translational repression, and is not required for  
108 sporozoite invasion but is needed during infection of hepatocytes for early  
109 maintenance of the PV<sup>15</sup>.

110 Here, we systematically analysed the role of P12p, P38 and B9 during sporozoite  
111 invasion, using a reverse genetics approach based on our Gene Out Marker Out  
112 (GOMO) strategy<sup>25</sup>. We report that *b9* gene deletion totally abrogates sporozoite  
113 infectivity, whilst *p12p* and *p38* are dispensable for hepatocyte infection in both *P.*  
114 *berghei* and *P. yoelii*. We show that B9 is a sporozoite micronemal protein and that  
115 B9-deficient sporozoites fail to productively invade hepatocytes. Secondary structure  
116 analysis and protein structure modelling indicate that B9 is a hybrid protein containing  
117 a CyRPA-like beta propeller domain in addition to non-canonical 6-cys domains.  
118 Structure-guided mutagenesis reveals that the propeller domain is not associated with  
119 host receptor usage but is essential for B9 function, possibly through the assembly of  
120 supramolecular protein complexes with the 6-Cys proteins P36 and P52 during host  
121 cell invasion.

122

123

## 124 RESULTS

### 125 Analysis of the repertoire of *Plasmodium* sporozoite 6-cys proteins suggests 126 that P36, P52 and B9 are employed by infectious sporozoites only

127 In order to define the repertoire of 6-cys proteins expressed at the sporozoite stage,  
128 we first analysed the proteome datasets of *P. falciparum*<sup>22,26</sup>, *P. vivax*<sup>24</sup>, *P. yoelii*<sup>26</sup> and  
129 *P. berghei*<sup>21</sup> sporozoites. As expected, P36 and P52 were identified by mass  
130 spectrometry in sporozoites from all four species. Interestingly, three other 6-cys  
131 proteins, P12p, P38 and B9, were consistently identified across the datasets. Among  
132 this core of five 6-cys proteins, P12p and P38 have been identified in the surface  
133 proteome of *P. falciparum* sporozoites, P12p being quantitatively enriched on the  
134 surface of activated parasites in the presence of bovine serum albumin<sup>27</sup>. Interestingly,  
135 P12p and P38 do not seem to be uniquely employed by sporozoites, as they have  
136 been detected in *P. falciparum* asexual and sexual blood stages<sup>28–32</sup>, and in *P. berghei*  
137 gametocytes<sup>33</sup>, respectively. In contrast, P36, P52 and B9 were identified in  
138 sporozoites only, and a recent study identified P36, P52 and B9 as up-regulated in  
139 infectious sporozoites (UIS) proteins in *P. falciparum* and *P. yoelii*, whilst P12p and  
140 P38 were also detected in oocyst-derived sporozoites<sup>34</sup>. These observations suggest  
141 that B9, like P36 and P52, may play a role in mature sporozoites.

142

### 143 Reverse genetics analysis in rodent malaria parasites shows that *b9* (but not 144 *p12p* and *p38*) is essential for sporozoite infectivity

145 A previous study reported that B9 is not expressed in sporozoites and is required for  
146 early liver stage development but not host cell invasion<sup>15</sup>. The contribution of P12p and  
147 P38 during sporozoite invasion has not been investigated so far, although the *p38*  
148 gene could be deleted in *P. berghei* without any detectable phenotypic defect during  
149 blood stage parasite growth and transmission to mosquitoes<sup>35,36</sup>. Given the consistent  
150 detection of P12p, P38 and B9 proteins in sporozoites by mass spectrometry, we  
151 sought to determine the functional importance of these proteins in *P. berghei* and *P.*

152 *yoelii* sporozoites using a reverse genetics approach. We used our GOMO strategy<sup>37</sup>  
153 to replace genes of interest, through homologous recombination with a GFP  
154 expression cassette under the control of a constitutive HSP70 promoter, to facilitate  
155 monitoring of host cell invasion (**Supplementary Fig. 1a**). Targeting vectors were  
156 assembled by inserting 5' and 3' homology fragments of *P. berghei* or *P. yoelii* *p12p*  
157 (PBANKA\_0111100; PY17X\_0112700), *p38* (PBANKA\_1107600; PY17X\_1108700)  
158 and *b9* (PBANKA\_0808100; PY17X\_0811300) genes in the GOMO-GFP plasmid<sup>37</sup>,  
159 and used to transfect wild type (WT) *P. berghei* (ANKA) or *P. yoelii* (17XNL) blood  
160 stage parasites. We then applied the GOMO selection strategy, consisting of positive  
161 selection with pyrimethamine, negative selection with 5-fluorocytosine and flow  
162 cytometry-assisted parasite sorting, as previously described<sup>37</sup>. Pure populations of  
163 GFP-expressing drug-selectable marker-free *PbΔp12p*, *PbΔp38*, *PbΔb9*, *PyΔp12p*,  
164 *PyΔp38* and *PyΔb9* parasite lines were obtained, confirming that none of the targeted  
165 genes are essential during blood stage replication of the parasite. Genotyping by PCR  
166 confirmed gene deletion and excision of the drug-selectable marker cassette, as  
167 desired, in all parasite lines (**Supplementary Fig. 1b-h**). All the mutants could be  
168 transmitted to mosquitoes and produced normal numbers of salivary gland  
169 sporozoites, similar to *Δp36* parasites (**Fig. 1a-b**). We then assessed the infectivity of  
170 the *P. berghei* and *P. yoelii* mutant lines in C57BL/6 and BALB/c mice, respectively.  
171 C57BL/6 mice injected with 10,000 *PbΔp12p* or *PbΔp38* sporozoites all developed a  
172 patent blood stage infection, like the parental *PbGFP* parasites (**Fig. 1c**). Similarly,  
173 BALB/c mice injected with 10,000 *PyΔp12p* or *PyΔp38* sporozoites all developed a  
174 patent blood stage infection (**Fig. 1d**). In sharp contrast, none of the animals injected  
175 with *P. berghei* or *P. yoelii* *Δb9* sporozoites developed parasitemia, phenocopying the  
176 *Δp36* mutants (**Fig. 1c-d**). Abrogation of *Δb9* sporozoite infectivity was also observed  
177 *in vitro* in hepatocyte cell lines. FACS analysis 24 hours post-infection revealed a  
178 dramatic reduction in the number of *PbΔb9* exoerythrocytic forms (EEFs) in

179 comparison to control PbGFP or Pb $\Delta p12p$  and Pb $\Delta p38$  sporozoites in HepG2 cells,  
 180 which was similar to the reduction observed with Pb $\Delta p36$  mutants (**Fig. 1e**). Using  
 181 antibodies specific for UIS4, a marker of the PV membrane (PVM) that specifically  
 182 labels productive vacuoles<sup>38,39</sup>, we confirmed that, in contrast to  $\Delta p12p$  and  $\Delta p38$   
 183 mutants,  $\Delta b9$  parasites were not able to form productive vacuoles (**Fig. 1f**). Together,  
 184 these results show that *b9* is essential for sporozoite liver infection both *in vivo* and *in*  
 185 *vitro*, corroborating the results of a previous study<sup>15</sup>, and that *p12p* and *p38* genes on  
 186 the contrary are dispensable for parasite invasion and liver stage development.

**Fig 1**

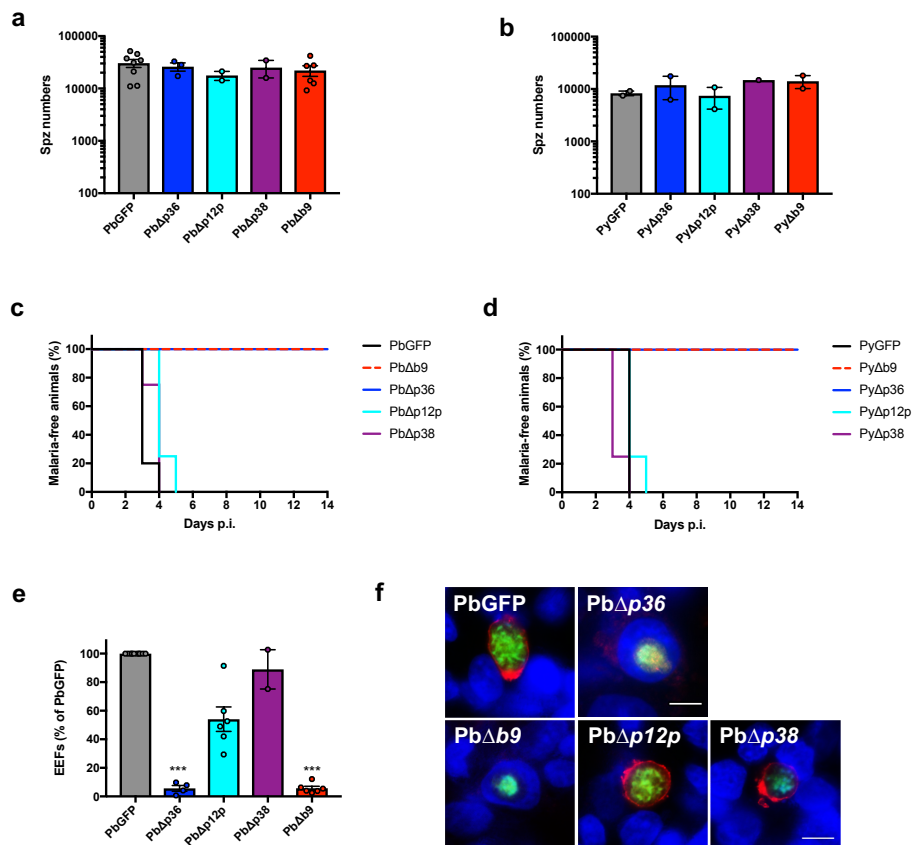

187

188 **Figure 1. Deletion of *b9* but not *p12P* or *p38* genes abrogates sporozoite**  
 189 **infectivity in *P. berghei* and *P. yoelii*.** **a**, Number of sporozoites isolated from the  
 190 salivary glands of mosquitoes infected with PbGFP, Pb $\Delta p36$ , Pb $\Delta p12p$ , Pb $\Delta p38$  or  
 191 Pb $\Delta b9$  parasites (mean  $\pm$  SD;  $p = 0.67$ , one-way ANOVA). **b**, Number of sporozoites  
 192 isolated from the salivary glands of mosquitoes infected with PyGFP, Py $\Delta p36$ ,



193 *PyΔp12p*, *PyΔp38* or *PyΔb9* parasites (mean +/- SD;  $p = 0.66$ , one-way ANOVA). **c**,  
194 Kaplan-Meier analysis of time to patency in C57BL/6 mice ( $n = 5$ ) after intravenous  
195 injection of  $10^4$  PbGFP, *PbΔp36*, *PbΔp12p*, *PbΔp38* or *PbΔb9* sporozoites. Mice were  
196 followed daily for the appearance of blood stage parasites ( $p = 0.0001$ , Log rank  
197 Mantel-Cox test). **d**, Kaplan-Meier analysis of time to patency in BALB/c mice ( $n = 5$ )  
198 after intravenous injection of  $10^4$  PyGFP, *PyΔp36*, *PyΔp12p*, *PyΔp38* or *PyΔb9*  
199 sporozoites. Mice were followed daily for the appearance of blood stage parasites ( $p$   
200  $< 0.0001$ , Log rank Mantel-Cox test). **e**, Infection rates were determined by  
201 quantification of EEFs (GFP-positive cells) 24 h after infection of HepG2 cell cultures  
202 with PbGFP, *PbΔp36*, *PbΔp12p*, *PbΔp38* or *PbΔb9* sporozoites. Results are expressed  
203 as % of control (PbGFP). \*\*\* $p < 0.001$  as compared to PbGFP (one-way ANOVA  
204 followed by Dunnett's multiple comparisons test). **f**, Immunofluorescence images of  
205 HepG2 cells infected with PbGFP, *PbΔp36*, *PbΔp12p*, *PbΔp38* or *PbΔb9* parasites  
206 expressing GFP (green) and labelled with anti-UIS4 antibodies (red) and Hoechst  
207 77742 (blue). PbGFP, *PbΔp12p* and *PbΔp38* are surrounded by a UIS4-positive PV  
208 membrane (red), while *PbΔp36* and *PbΔb9* parasites are intranuclear and lack a UIS4-  
209 positive PVM. Scale bar, 10  $\mu\text{m}$ .

210

211

## 212 **B9 is required for sporozoite invasion**

213 After infection of cell cultures with  $\Delta b9$  sporozoites, only very low numbers of  
214 intracellular parasites were observed, all of which were seemingly intranuclear and  
215 lacked a UIS4-labeled PVM, similar to the  $\Delta p36$  mutants (**Fig. 1f**). Intranuclear EEFs  
216 are known to result from cell traversal events<sup>40</sup>. Accordingly, a cell wound-repair assay  
217 confirmed that the cell traversal activity of  $\Delta b9$  sporozoites is not different to PbGFP  
218 parasites, in both HepG2 and HepG2/CD81 cells (**Fig 2a-b**). In contrast, direct  
219 quantification of invaded cells by FACS revealed that host cell invasion by  $\Delta b9$

220 sporozoites is greatly impaired in both cell types (**Fig. 2c-d**). Based on the similar  
221 phenotype observed with  $\Delta b9$  and  $\Delta p36$  parasites<sup>6</sup>, we hypothesized that B9 could  
222 play a role during productive invasion. Productive host cell invasion is associated with  
223 discharge of the sporozoite rhoptries, resulting in depletion of the rhoptry proteins  
224 RON2 and RON4<sup>3,41</sup>. To monitor rhoptry discharge in B9-deficient parasites, we  
225 genetically modified the *ron4* locus in the  $Pb\Delta b9$  mutant line to replace the endogenous  
226 RON4 by a RON4-mCherry fusion by double homologous recombination  
227 (**Supplementary Fig. 2**). In parallel, we also genetically modified parental PbGFP and  
228 mutant  $Pb\Delta p36$  parasites, using the same RON4-targeting vector (**Supplementary**  
229 **Fig. 2**). Examination of *PbGFP/RON4-mCherry*, *Pb $\Delta b9$ /RON4-mCherry* and  
230 *Pb $\Delta p36$ /RON4-mCherry* by fluorescence microscopy confirmed expression of the  
231 rhoptry marker in merozoites and sporozoites, as expected<sup>41</sup> (**Fig. 2e**). We then  
232 performed invasion assays in HepG2 cells and analysed the presence of the RON4-  
233 mCherry rhoptry marker by fluorescence microscopy. As expected, the RON4-  
234 mCherry signal was lost in a vast majority of intracellular *PbGFP/RON4-mCherry*  
235 sporozoites, reflecting rhoptry discharge during productive invasion (**Fig. 2f**). In sharp  
236 contrast, RON4-mCherry was detected in all examined  $Pb\Delta b9$  and  $Pb\Delta p36$   
237 intracellular sporozoites, indicating that sporozoites lacking B9 or P36 invade cells  
238 without secreting their rhoptries, i.e. through traversal mode only. Altogether, these  
239 data demonstrate that genetic deletion of B9 abrogates productive host cell invasion  
240 by sporozoites, phenocopying the lack of P36. Our data also show that B9, like P36,  
241 is essential for both CD81-dependent and CD81-independent sporozoite entry.

Fig 2

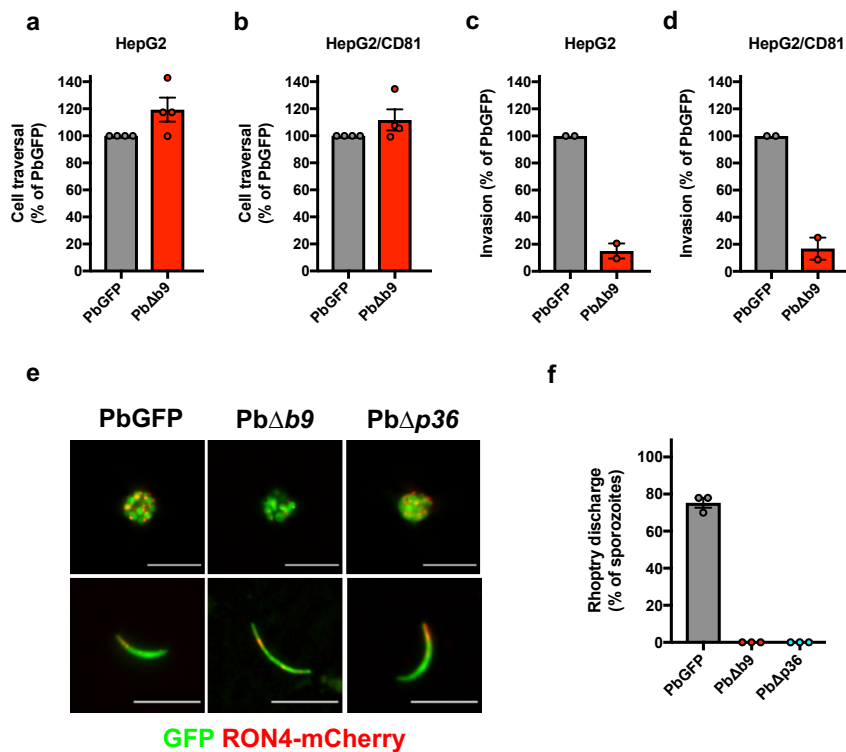

242

243 **Figure 2. Sporozoites require B9 for productive invasion of host cells. a-b,**

244 Sporozoite cell traversal activity was analysed in HepG2 (a) and HepG2/CD81 (b) cell

245 cultures incubated for 3 hours with PbGFP or PbΔb9 sporozoites in the presence of

246 rhodamine-labelled dextran. The number of traversed (dextran-positive) cells was

247 determined by FACS. **c-d,** Sporozoite invasion rates were determined in HepG2 (c)

248 and HepG2/CD81 (d) cell cultures incubated for 3 hours with PbGFP or PbΔb9

249 sporozoites. The percentage of invaded (GFP-positive) cells was determined by

250 FACS. **e,** Fluorescence microscopy images of RON4-mCherry-expressing PbGFP,

251 PbΔb9 and PbΔp36 erythrocytic schizonts (upper panels) and salivary gland

252 sporozoites (lower panels). Scale bar, 10 μm. **f,** Rhoptry discharge was analysed by

253 fluorescence microscopy examination of HepG2 cells incubated for 3 hours with

254 RON4-mCherry- expressing PbGFP, PbΔb9 or PbΔp36 sporozoites. Results are

255 expressed as the percentage of parasites without detectable RON4-mCherry signal.

256

257

258 **B9 is secreted from the sporozoite micronemes**

259         The phenotype of  $\Delta b9$  mutants, combined with proteomic data, implies that the  
260 protein B9 is expressed in *P. berghei* sporozoites and plays a crucial role during host  
261 cell productive invasion, unlike previously thought<sup>15</sup>. In order to confirm the expression  
262 of B9 at the protein level and define its localization, we genetically modified the  
263 endogenous *b9* locus in *P. berghei* (PbGFP) to insert a triple Flag epitope in the  
264 protein-coding sequence, through double homologous recombination  
265 (**Supplementary Fig. 3a**). Because B9 is predicted to be glycosylphosphatidylinositol  
266 (GPI) anchored, we inserted the 3xFlag tag towards the C-terminus of the protein,  
267 downstream of the putative 6-cys domains but upstream of the predicted omega site  
268 (aspartate residue at position 826). Correct integration of the construct was confirmed  
269 by PCR on genomic DNA from B9-Flag blood stage parasites (**Supplementary Fig.**  
270 **3b**). Importantly, we observed no defect in sporozoite development (**Fig. 3a**) and  
271 infectivity (**Fig. 3b**) in the B9-Flag line, demonstrating that the insertion of a 3xFlag  
272 epitope in B9 sequence had no detrimental effect on the protein function.

273         Immunofluorescence with anti-Flag antibodies revealed that B9 is readily  
274 detected in B9-Flag salivary gland sporozoites, with a distribution pattern typical of a  
275 micronemal protein (**Fig. 3c**). Super-resolution microscopy using stimulated-emission-  
276 depletion (STED) showed that B9 distributes in numerous vesicles localized on each  
277 side of the nucleus, consistent with B9 being a micronemal protein (**Fig. 3d**).  
278 Interestingly, B9 did not co-localize with the apical membrane antigen 1 (AMA1),  
279 suggesting that the two proteins are present in distinct microneme subsets in salivary  
280 gland sporozoites (**Fig. 3e**). We next analysed the fate of B9 upon activation of  
281 sporozoite microneme secretion, by western blot. In non-activated control parasites,  
282 B9 was detected as a single band around 80 kDa (**Fig. 3f**). Upon stimulation of  
283 microneme secretion, B9 was also recovered in the supernatant fraction as a slightly  
284 smaller band, indicating that B9 is secreted from sporozoites upon activation, possibly

285 after proteolytic processing (**Fig. 3f**). We failed to detect B9 on the surface of B9-Flag  
 286 sporozoites by immunofluorescence, irrespective of parasite activation, suggesting  
 287 that following microneme secretion, B9 is mainly released as a shed protein.

**Fig 3**

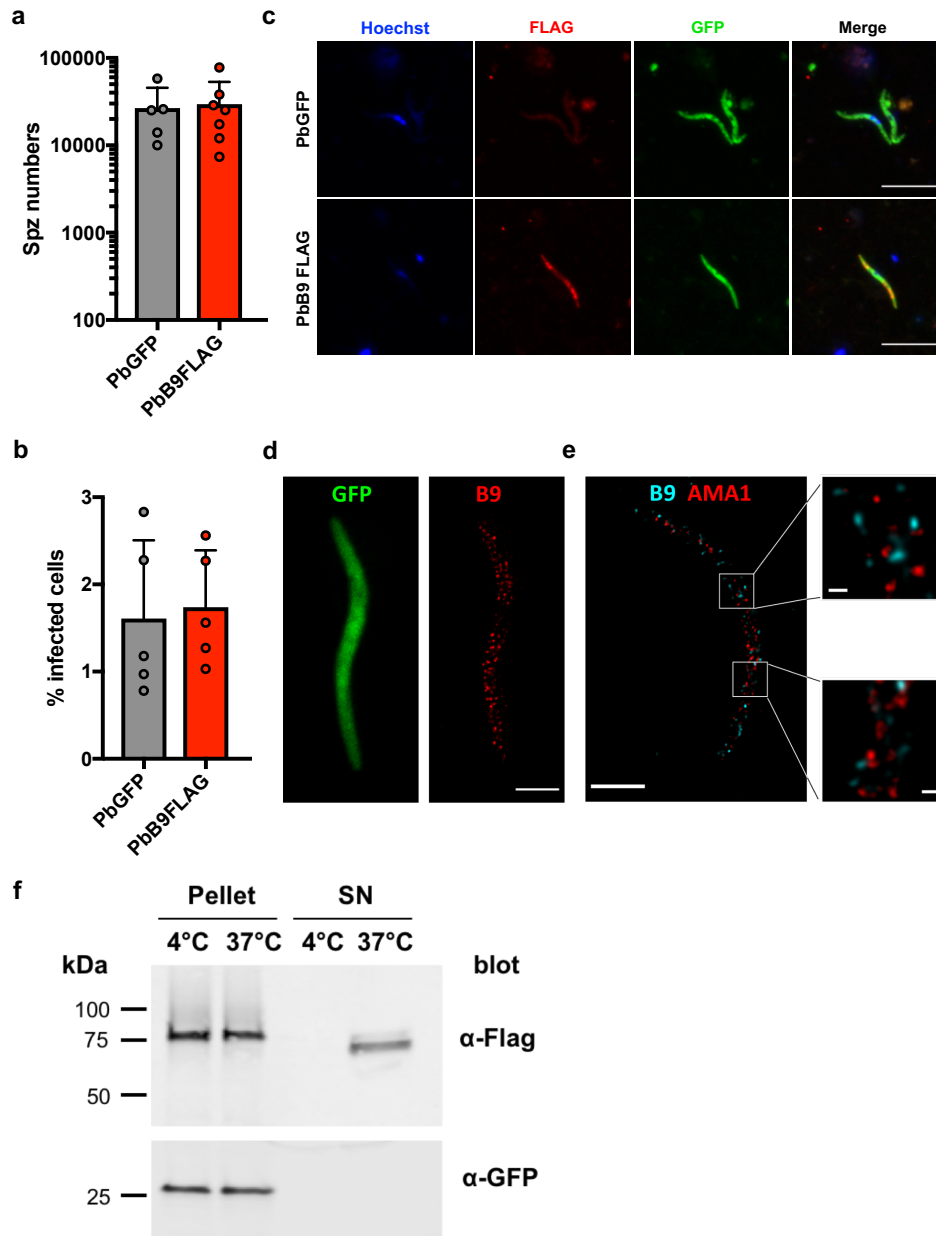

288

289 **Figure 3. B9 localizes to a subset of sporozoite micronemes and is secreted**  
 290 **upon parasite activation.** **a**, Number of sporozoites isolated from the salivary glands  
 291 of mosquitoes infected with PbGFP or PbB9-Flag parasites (mean +/- SD;  $p = 0.2893$ ,

292 Two-tailed ratio paired t test). **b**, Infection rates of PbGFP and PbB9-Flag parasites  
293 were determined in HepG2 cells 24 hours post-infection. The results show the  
294 percentage of invaded (GFP-positive) cells as determined by FACS (mean +/- SD; p =  
295 0.6768, Two-tailed ratio paired t test). **c**, Immunofluorescence analysis of PbGFP and  
296 PbB9-Flag sporozoites labelled with anti-Flag antibodies (red). Parasites express GFP  
297 (green) and nuclei were stained with Hoechst 77742 (blue). Scale bar, 10  $\mu$ m. **d**,  
298 Localization of B9 in sporozoites. First panel, confocal image of GFP (green); second  
299 panel, visualization of B9-Flag (red) using 2D STED (maximum intensity projection).  
300 Scale bar, 2  $\mu$ m. **e**, STED images of a B9-flag sporozoite labelled with anti-AMA1 (red)  
301 and anti-Flag (cyan) antibodies. Scale bar, 2  $\mu$ m (200 nm in insets). **f**, Immunoblot of  
302 B9-Flag sporozoite pellets and supernatants in control conditions (4°C) or after  
303 stimulation of microneme secretion (37°C), using anti-Flag or anti-GFP antibodies. The  
304 data shown are representative of three independent experiments.

305

306

### 307 **B9 contains a CyRPA-like beta propeller domain**

308 To get more insights into B9 properties, we investigated sequence and  
309 structural features of the protein using *P. falciparum* B9 as the reference sequence.  
310 Both hydrophobic cluster analysis and secondary structure prediction of B9 suggested  
311 that the whole sequence contains some strand and helix structures (**Supplementary**  
312 **Fig. 4**). However, no annotated conserved domain was detected at the sequence level  
313 using InterPro. In sharp contrast, three domains were predicted at the structural level  
314 using HHpred: an N-terminus propeller domain similar to that of CyRPA (e-value: 5.4e-  
315 03) encoded by the first exon, and two putative but poorly supported 6-cys domains  
316 encoded by the second exon (e-value > 1) (**Fig. 4a**). CyRPA is a cysteine-rich protein  
317 expressed in *P. falciparum* merozoites, where it forms a protein complex that is  
318 essential for invasion of erythrocytes<sup>42,43</sup>. B9 is enriched in cysteines, nine being

319 located in the predicted propeller domain that we suppose are involved in the formation  
 320 of disulphide bonds in a similar manner to CyRPA<sup>44</sup>, to stabilize the protein structure  
 321 (Fig. 4a).

**Fig 4**

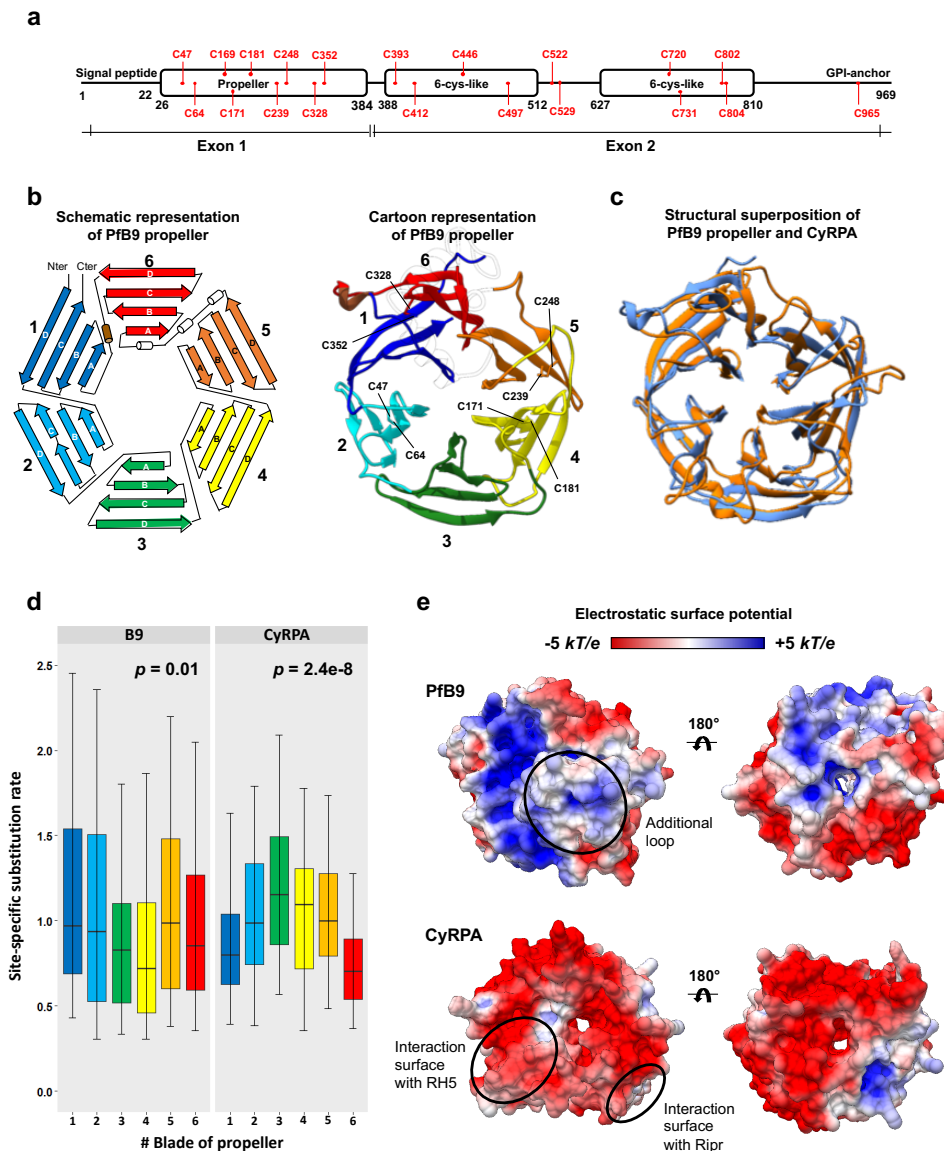

322

323 **Figure 4. Structural and evolutionary features of B9 propeller.** **a**, Predicted B9  
 324 conserved domains. Pfb9 was used as the reference sequence. Cysteines are  
 325 indicated in red. The delimitation of the domains is based on the HHpred results. B9 is  
 326 composed of two exons, the first one covering the whole propeller domain. **b**, Predicted  
 327 tertiary structure of Pfb9 propeller. The predicted model is indicated as a schematic  
 328 representation (*left*) and as cartoon (*right*). Each of the six blades is indicated with a

329 specific color, labeled 1 to 6, and is composed of four-stranded anti-parallel beta-sheet,  
330 labeled A to D. The four disulfide bridges found in Pfb9 are indicated. The long loop  
331 connecting blades 5 and 6 in the cartoon representation is transparent for ease of  
332 representation. **c**, Structural superposition of Pfb9 propeller with CyRPA. Pfb9 and  
333 CyRPA are respectively colored in blue and orange. Both superposition and RMSD  
334 calculation were based on all C $\alpha$  atoms using the *MatchMaker* function in UCSF  
335 Chimera. **d**, Conservation level of the six blades of B9 propeller and CyRPA. Site-  
336 specific rates were estimated using the GP4Rate tool, and were compared between  
337 the six blades using non-parametric Kruskal-Wallis *H* test. Box boundaries represent  
338 the first and third quartiles and the length of whiskers correspond to 1.5 times the  
339 interquartile range. **e**, Electrostatic surface potential of Pfb9 propeller and CyRPA  
340 structures, estimated with the APBS method. Electrostatic potential values are in units  
341 of kT/e at 298 K, on a scale of -5 kT/e (red) to +5 kT/e (blue). White color indicates a  
342 neutral potential. The missing charges were added using the Add Charge function  
343 implemented in UCSF Chimera. The additional long loop connecting blades 5 and 6 of  
344 Pfb9 propeller and the interaction surfaces of CyRPA with Rh5 and Ripr are indicated  
345 with circles.

346

347

348 To explore the structural features of the B9 propeller, we predicted the tertiary  
349 structure of Pfb9 propeller (covering positions 26 to 386) by homology modelling using  
350 CyRPA as a template structure<sup>44</sup> (PDB ID: 5TIH; **Supplementary File 1**;  
351 **Supplementary Fig. 5**). As expected, Pfb9 adopted a six-bladed propeller structure,  
352 with each blade being composed of four-stranded anti-parallel beta-sheets (**Fig. 4b**).  
353 Four disulphide bonds were predicted within the blades which may stabilize each  
354 individual blade of the Pfb9 propeller (C47-C64, C171-C181, C239-C248, C328-C352;  
355 **Fig. 4b**). Furthermore, a long loop connecting blades 5 and 6 and containing three  
356 putative short helices was observed in the Pfb9 propeller, which was not found in



357 CyRPA and in most *Plasmodium* B9 proteins (such as PbB9 and PyB9;  
358 **Supplementary Fig. 6**). This partially structured region is supported by intrinsic  
359 disorder prediction (**Supplementary Fig. 4**), in line with another characteristic of  
360 CyRPA, where the loop located on blade 5 likely becomes disordered to accommodate  
361 occupancy by a helix of Rh5<sup>43</sup>. The model superimposed well with the CyRPA  
362 structure, except for some blade- and strand-connecting loops (RMSD: 3.8 Å; **Fig. 4c**).  
363 This similar fold, in addition to the binding activities of CyRPA (targeting Rh5 and  
364 Ripr<sup>43</sup>), suggests that the B9 propeller may promote protein-protein interactions.

365         Since CyRPA is functionally annotated and its binding properties are known,  
366 we checked whether the B9 propeller and CyRPA shared a common evolutionary  
367 history, which could help to predict the functional sites in the B9 propeller. For this, we  
368 generated two datasets consisting of distinct *Plasmodium* B9 (n = 23) or CyRPA (n =  
369 18) sequences (**Supplementary Tables 1 and 2**). Multiple sequence alignments and  
370 corresponding phylogenetic trees of these datasets (**Supplementary Files 2 and 3**,  
371 and **Supplementary Fig. 7**) were then used concomitantly with their respective tertiary  
372 structures to estimate spatially correlated site-specific substitution rates using the  
373 GP4Rate tool (**Supplementary Tables 3 and 4**). The six blades were found to be  
374 heterogeneously conserved over time for both B9 and CyRPA (Kruskal-Wallis *H* test:  
375 B9:  $p = 0.01$ ; CyRPA:  $p = 2.4e-8$ ; **Fig. 4d**). Interestingly, we noticed distinct patterns  
376 of evolution between the two proteins: the most conserved blades of B9 propeller (3  
377 and 4) are the less conserved ones in CyRPA (**Fig. 4d**). Because CyRPA interacts  
378 with Ripr through its most conserved blade<sup>43</sup>, i.e. 6 (**Fig. 4d**), we logically hypothesize  
379 that the blades 3 and 4 of the B9 propeller may target putative partners. Finally, in  
380 concordance with different evolutionary histories, we note that the PfB9 propeller and  
381 CyRPA display a dissimilar electrostatic surface potential. While almost the entire  
382 surface of CyRPA (including the regions mediating interactions with Rh5 and Ripr) is  
383 electronegative, some parts of the PfB9 propeller are electropositive (**Fig. 4e**), thus  
384 suggesting different binding properties.

385

386 **The propeller domain is required for B9 function**

387 We next sought to define the functional importance of the predicted propeller  
 388 domain, using a structure-guided genetic complementation strategy to evaluate the  
 389 functionality of truncated B9 proteins (**Fig. 5a**). We assembled various constructs  
 390 encoding the entire or partially deleted B9, all containing an intact signal peptide and  
 391 C-terminus sequences to ensure correct secretion and GPI-anchoring of the protein  
 392 (**Fig. 5b**).

**Fig 5**

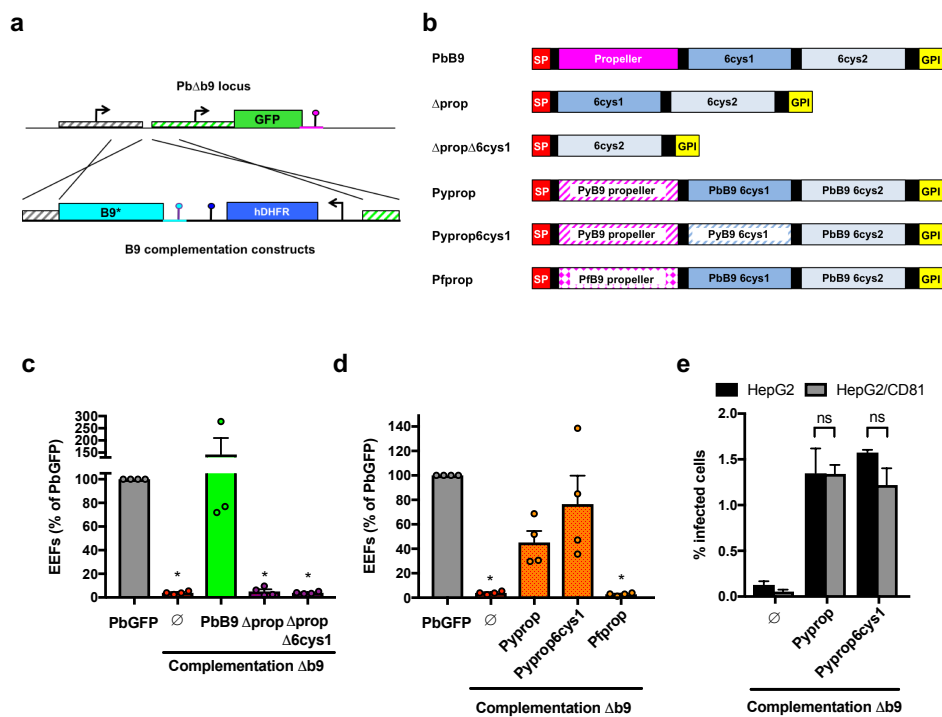

393

394 **Figure 5. The propeller domain is required for B9 function during sporozoite**  
 395 **invasion. a**, Strategy used to genetically complement PbΔb9 with different versions of  
 396 B9 (indicated as B9\*) by double crossover homologous recombination. **b**, Schematic  
 397 representation of the B9 constructs used for genetic complementation. SP, signal  
 398 peptide, GPI, glycosylphosphatidylinositol. **c**, Infection rates were determined by  
 399 quantification of EEFs (GFP-positive cells) 24 h after infection of HepG2 cell cultures  
 400 with sporozoites of PbGFP, PbΔb9 or PbΔb9 complemented with PbB9, Δprop or

401  $\Delta$ prop $\Delta$ 6cys1 constructs. Results are expressed as % of control (PbGFP). \*p < 0.05  
402 as compared to PbGFP (one-way ANOVA followed by Dunnett's multiple comparisons  
403 test). **d**, Infection rates were determined by quantification of EEFs (GFP-positive cells)  
404 24 h after infection of HepG2 cell cultures with sporozoites of PbGFP, Pb $\Delta$ b9 or Pb $\Delta$ b9  
405 complemented with Pyprop, Pyprop6cys1 or Pfprop constructs. Results are expressed  
406 as % of control (PbGFP). \*p < 0.05 as compared to PbGFP (one-way ANOVA followed  
407 by Dunnett's multiple comparisons test). **e**, Infection rates in HepG2 or HepG2/CD81  
408 cells infected with Pb $\Delta$ b9 or Pb $\Delta$ b9 complemented with PyProp or Pyprop6cys1  
409 constructs were determined 24 hours post-infection. The results show the percentage  
410 of invaded (GFP-positive) cells as determined by FACS (mean +/- SD). ns, non-  
411 significant (one-way ANOVA followed by Dunnett's multiple comparisons test).

412

413

414         Constructs were used for transfection of the drug selectable marker-free Pb $\Delta$ b9  
415 mutant line. After confirmation of correct integration by genotyping PCR  
416 (**Supplementary Fig. 8**), genetically complemented parasites were transmitted to  
417 mosquitoes, and sporozoites were tested for infectivity in cell cultures.  
418 Complementation of Pb $\Delta$ b9 sporozoites with a construct encoding the entire PbB9 fully  
419 restored sporozoite infectivity in HepG2 cell cultures (**Fig. 5c**), validating the genetic  
420 complementation approach. In contrast, parasites complemented with a truncated B9  
421 lacking the propeller domain, alone or in combination with the first 6-cys domain, were  
422 not infectious, phenocopying the parental B9-deficient parasites (**Fig. 5c**). These  
423 results show that the propeller domain is required for B9 function during sporozoite  
424 entry. Interestingly, chimeric B9 versions where the propeller domain of PbB9 was  
425 replaced by the equivalent sequence from PyB9 (Pyprop, Pyprop6cys1; **Fig. 5b**)  
426 restored sporozoite infectivity (**Fig. 5d**). In contrast, substitution of the PfB9 propeller  
427 domain for the PbB9 propeller (Pfprop; **Fig. 5b**) did not restore infectivity in

428 complemented parasites (**Fig. 5d**). Interestingly, complementation with the PyB9  
429 propeller domain restored infection in both HepG2, which express SR-B1 but not  
430 CD81, and HepG2/CD81 cells, which express both receptors<sup>6</sup>, suggesting that the B9  
431 propeller domain does not restrict host receptor usage (**Fig. 5e**).

432

### 433 **The propeller domain of B9 interacts with P36 and P52**

434 Our structural modelling revealed that B9 contains an N-terminus beta-  
435 propeller domain structurally similar to CyRPA. In *P. falciparum* merozoites, CyRPA  
436 interacts with Rh5 and Ripr to form a complex that is essential for invasion of  
437 erythrocytes<sup>42,43,45</sup>. While Ripr is conserved among *Plasmodium* species, CyRPA is  
438 found in primate but not rodent parasites, and Rh5 is restricted to *P. falciparum* and  
439 other *Laverania* species<sup>46</sup>. As Rh5 and Ripr are not expressed by sporozoites<sup>21,23,24</sup>,  
440 we hypothesized that B9 might be involved in the formation of distinct protein  
441 complexes in sporozoites. To test this hypothesis, we first performed co-  
442 immunoprecipitation experiments with anti-Flag antibodies, using protein extracts from  
443 B9-Flag sporozoites, followed by protein identification by mass spectrometry.  
444 However, B9 was the only protein consistently identified in three independent  
445 biological replicates by mass spectrometry (data not shown).

446 We considered that B9 might interact with other sporozoite proteins only at the  
447 time of host cell invasion, similarly to CyRPA, which interacts with Rh5 following  
448 secretion of merozoite apical organelles<sup>42</sup>. Because sporozoite invasion is a rare event  
449 that is difficult to address experimentally, we opted for an alternative strategy based  
450 on heterologous expression of sporozoite proteins in mammalian cells, to test for  
451 potential interactions between B9 and the 6-cys proteins P36 and P52 as candidate  
452 partners, a choice motivated by the shared phenotype of gene deletion mutants. For  
453 this purpose, we used a surface display approach to express *P. berghei* proteins at the  
454 surface of Hepa1-6 cells after transient transfection<sup>47</sup>. Codon-optimized versions of the  
455 propeller domain of PbB9 (amino acids 31-348) or the tandem 6-cys domains of PbP36

456 (amino acids 67-352) were fused at the N-terminus to the signal peptide of the bee  
457 venom melittin (BVM), and at the C-terminus to a V5 epitope tag and the  
458 transmembrane domain of glycoporphin A, followed by mCherry, C-Myc and 6xHis tags  
459 (**Fig. 6a**). As a control, we used an mCherry construct containing all elements except  
460 the B9 or P36 sequences. Codon-optimized versions of the tandem 6-cys domains of  
461 *P. berghei* P36 and P52 (amino acids 33-302) were expressed either as  
462 transmembrane proteins with 3xFlag and GFP tags, or as soluble secreted proteins  
463 (sol), with a 3xFlag epitope tag only at the C-terminus (**Fig. 6a**). Interaction between  
464 proteins was then tested in co-transfection experiments, by immunoprecipitation  
465 followed by western blot. Both P52-GFP (**Fig. 6b**) and P52-sol (**Fig. 6c**) proteins were  
466 co-immunoprecipitated with P36-mCherry but not with the control mCherry protein,  
467 validating the strategy and confirming the interaction between *P. berghei* P36 and P52  
468 proteins. More importantly, these experiments showed that P36 and P52 co-  
469 immunoprecipitated with B9-mCherry, in both transmembrane (**Fig. 6b**) and soluble  
470 (**Fig. 6c**) configurations. These results strongly suggest that B9, P36 and P52 form a  
471 supramolecular protein complex that, when considering the functional data in this  
472 study, appears to mediate productive invasion of hepatocytes by sporozoites.

**Fig 6**

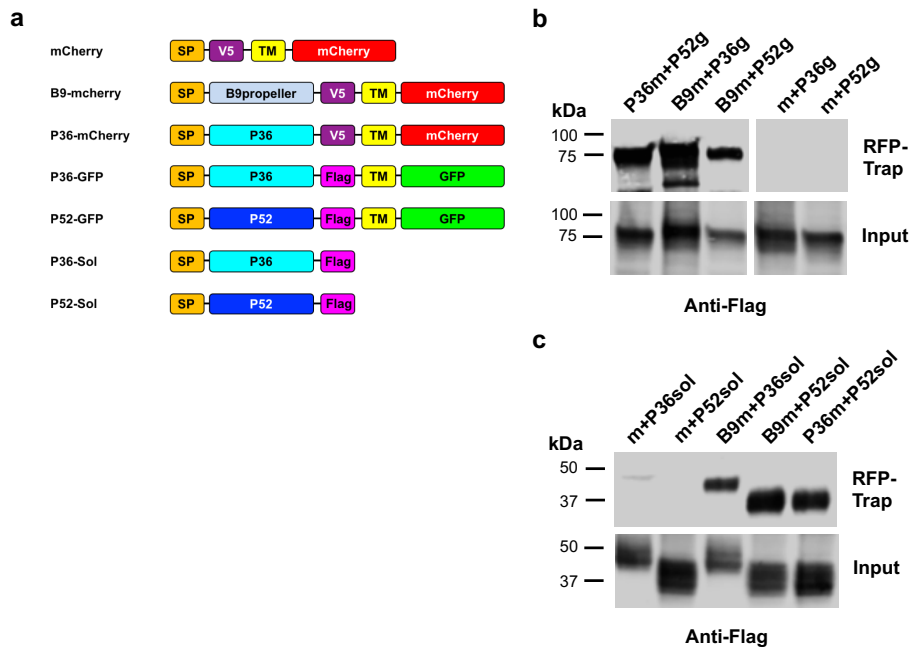

473

474 **Figure 6. The propeller domain of B9 interacts with P36 and P52.** **a**, Schematic  
475 representation of the constructs used for heterologous expression in mammalian cells.  
476 SP, signal peptide from the bee venom melittin; TM, transmembrane domain and C-  
477 terminal portion of mouse Glycophorin A. **b-c**, Hepa1-6 cells were transiently  
478 transfected with constructs encoding mCherry (m), B9-mCherry (B9m), or P36-  
479 mCherry (P36m) constructs, together with P36-GFP (P36g), P52-GFP (P52g), P36sol  
480 or P52sol constructs. Following immunoprecipitation of mCherry-tagged proteins, co-  
481 immunoprecipitated proteins (RFP-trap) and total extracts (input) were analysed by  
482 western blot using anti-Flag antibodies. The data shown are representative of three  
483 independent experiments.

484

485

486 **DISCUSSION**

487 Productive invasion of hepatocytes is a crucial step following transmission of  
488 the malaria parasite by a mosquito, however the molecular mechanisms involved  
489 remain poorly understood. Until now, only two sporozoite-specific proteins, the 6-cys  
490 proteins P36 and P52, have been associated with productive host cell invasion<sup>6,8</sup>. Here  
491 we identify another member of the 6-cys family, B9, as a crucial entry factor. Our data  
492 contradict in part those from a previous study, where the authors concluded that B9 is  
493 not expressed in sporozoites and is not involved in parasite entry, based mainly on  
494 indirect assays<sup>15</sup>. In this study, we demonstrate through genetic tagging that B9 is  
495 expressed in *P. berghei* sporozoites, corroborating mass spectrometry data<sup>21-24</sup>. Direct  
496 quantification of invasion by flow cytometry established that *PbΔb9* parasites have an  
497 invasion defect. In addition, *PbΔb9* sporozoites do not discharge their rhoptries upon  
498 contact with host cells, similar to *PbΔp36* sporozoites, indicating that both proteins are  
499 acting at an early step during invasion. We further provide evidence that B9 interacts  
500 with P36 and P52, suggesting that the three proteins participate in an invasion complex  
501 that is required for productive invasion of hepatocytes.

502 Comparison of profile hidden Markov models between PfB9 and tertiary  
503 structure database identified an N-terminus beta propeller domain structurally similar  
504 to CyRPA, a cysteine-rich protein expressed in *P. falciparum* merozoites, where it  
505 forms a protein complex that is essential for invasion of erythrocytes<sup>42,43</sup>. Our data  
506 suggest that the propeller domain of B9 directly interacts with both P36 and P52. We  
507 speculate that blades 3 and 4 of the propeller, which are the most conserved, could be  
508 involved in these interactions. Interestingly, the interaction of B9 with P36 and P52 was  
509 detected using a heterologous expression system but not by co-IP from sporozoite  
510 protein extracts. This observation suggests that B9 may interact with P36 and P52 only  
511 after parasite activation, similar to CyRPA, which forms a complex with Rh5 and Ripr  
512 only at the time of merozoite invasion in *P. falciparum*<sup>42</sup>. B9 was secreted from

513 sporozoites upon stimulation of microneme exocytosis, as described previously with  
514 P36 in *P. yoelii*<sup>11</sup>. B9 shedding could be associated with proteolytic processing, as  
515 suggested by the differential migration pattern in western blots. This suggests two  
516 possible models, where B9 may bind to P36/P52 either as a membrane-bound or as a  
517 free form. Interestingly, although B9 displayed a typical micronemal distribution, it did  
518 not colocalize with AMA1. This observation supports the hypothesis that sporozoites  
519 contain discrete subsets of micronemes, associated with specific functions<sup>4</sup>.

520 *P. berghei* and *P. yoelii* sporozoites use different pathways to invade  
521 hepatocytes, with the latter being strictly dependent on CD81, like *P. falciparum*<sup>5,7</sup>.  
522 Inter-species complementation experiments have shown that P36 (but not P52) is a  
523 key determinant of this differential usage of host receptors<sup>6</sup>. Using a similar approach,  
524 we show that the propeller domain of PyB9 can functionally replace the homologous  
525 sequence in PbB9, however without altering host receptor usage. This suggests that  
526 the B9 propeller does not directly participate in interaction with host receptors. Rather,  
527 we hypothesize that B9 may regulate the trafficking and/or binding of P36 to host cells,  
528 possibly by concentrating P36-P52 complexes at the surface of the parasite. In  
529 contrast, substituting the PfB9 propeller for the *P. berghei* domain abolished protein  
530 function, possibly because of impaired interactions with *P. berghei* P36 and/or P52. In  
531 this regard, the PfB9 and PbB9 propeller domains show only 48% identity at the amino  
532 acid level, versus 90% between PyB9 and PbB9 domains (**Supplementary Fig. 6**).  
533 Reciprocally, the essential role of B9 in assembling invasion complexes with P36 and  
534 P52 could also explain why *P. falciparum* and *P. vivax* P36 and P52 failed to  
535 compensate for the absence of their counterparts in *P. berghei*<sup>6</sup>, as these proteins may  
536 not associate with PbB9 to form functional complexes.

537 Interestingly, an improved version of the neural network-based model  
538 AlphaFold<sup>48</sup> predicts that the C-terminus portion of B9 is organized in three beta  
539 sandwiches rather than two (<https://alphafold.ebi.ac.uk/>). The structures of these  
540 domains and their function remain to be experimentally determined. While our data



541 suggest that B9 6-cys-like domains are not required for interaction with P36 and P52,  
542 they might regulate the activity of the propeller and/or participate in interactions with  
543 host cell surface molecules.

544 In conclusion, this study reveals that the 6-Cys protein B9 is required for  
545 productive host cell invasion by sporozoites. B9 contains a functionally important beta-  
546 propeller domain that is likely involved in the formation of a supramolecular protein  
547 complex with P36 and P52. Our results suggest that *Plasmodium* sporozoites and  
548 merozoites, despite using distinct sets of parasite and host entry factors, may share  
549 common structural modules to assemble protein complexes for invasion of host cells.  
550 The complex formed by B9, P36 and P52 proteins may represent a potential target for  
551 intervention strategies to prevent the initial stages of malaria liver infection.

552

## 553 **METHODS**

### 554 **Ethics Statement**

555 All mouse work was conducted in strict accordance with the Directive 2010/63/EU of  
556 the European Parliament and Council 'On the protection of animals used for scientific  
557 purposes'. Protocols were approved by the Ethical Committee Charles Darwin N 005  
558 (approval #7475-2016110315516522).

559

### 560 **Experimental animals, parasites, and cell lines**

561 *P. berghei* and *P. yoelii* blood stage parasites were propagated in female Swiss mice  
562 (6–8 weeks old, from Janvier Labs). We used wild type *P. berghei* (ANKA strain, clone  
563 15cy1) and *P. yoelii* (17XNL strain, clone 1.1), and GFP-expressing PyGFP and  
564 PbGFP parasite lines, obtained after integration of a GFP expression cassette at the  
565 dispensable *p230p* locus<sup>25</sup>. *Anopheles stephensi* mosquitoes were fed on *P. berghei*  
566 or *P. yoelii*-infected mice using standard methods<sup>49</sup>, and kept at 21°C and 24°C,  
567 respectively. *P. berghei* and *P. yoelii* sporozoites were collected from the salivary  
568 glands of infected mosquitoes 21–28 or 14–18 days post-feeding, respectively. *P.*  
569 *berghei* and *P. yoelii* sporozoite infections were performed in female C57BL/6 or  
570 BALB/c mice, respectively (6 weeks old, from Janvier Labs), by intravenous injection  
571 in a tail vein. HepG2 (ATCC HB-8065), HepG2/CD81<sup>40</sup> and Hepa1-6 cells (ATCC CRL-  
572 1830) were cultured at 37°C under 5% CO<sub>2</sub> in DMEM supplemented with 10% fetal  
573 calf serum and antibiotics (Life Technologies), as described<sup>7</sup>. HepG2 and  
574 HepG2/CD81 were cultured in culture dishes coated with rat tail collagen I (Becton-  
575 Dickinson).

576

### 577 **Gene deletion of *p12p*, *p38* and *b9* in *P. berghei* and *P. yoelii***

578 Gene deletion mutant parasites were generated using our “Gene Out Marker Out”  
579 (GOMO) strategy<sup>25</sup>. For each target gene, a 5' fragment and a 3' fragment were  
580 amplified by PCR from *P. berghei* (ANKA) or *P. yoelii* (17XNL) WT genomic DNA,

581 using primers listed in **Supplementary Table 5**, and inserted into *SacII/NotI* and  
582 *XhoI/KpnI* restriction sites, respectively, of the GOMO-GFP vector<sup>25</sup>, using the In-  
583 Fusion HD Cloning Kit (Clontech). The resulting targeting constructs were linearized  
584 with *SacII* and *KpnI* before transfection. All constructs used in this study were verified  
585 by DNA sequencing (Eurofins Genomics). Purified schizonts of *P. berghei* ANKA or *P.*  
586 *yoelii* 17XNL WT parasites were transfected with targeting constructs by  
587 electroporation using the AMAXA Nucleofector™ device, as described<sup>50</sup>, and  
588 immediately injected intravenously in mice. GFP-expressing parasite mutants were  
589 then isolated by flow cytometry after positive and negative selection rounds, as  
590 described<sup>25</sup>. Parasite genomic DNA was extracted using the Purelink Genomic DNA  
591 Kit (Invitrogen), and analysed by PCR using primer combinations specific for WT, 5' or  
592 3' recombined and marker excised loci (listed in **Supplementary Table 6**).

593

#### 594 **Genetic tagging of RON4 and B9**

595 Fusion of mCherry at the C-terminus of RON4 was achieved through double crossover  
596 homologous recombination. For this purpose, 5' and 3' homology fragments,  
597 consisting of a 1.2 kb terminal RON4 fragment (immediately upstream of the stop  
598 codon) and a 0.6 kb downstream fragment were amplified by PCR using primers listed  
599 in **Supplementary Table 7**, and cloned into *NotI/SpeI* and *HindIII/KpnI* sites,  
600 respectively, of the B3D+mCherry plasmid<sup>51</sup>. The resulting construct was linearized  
601 with *NotI* and *KpnI* before transfection of PbGFP, Pb $\Delta b9$  or Pb $\Delta p36$  purified schizonts.  
602 Recombinant parasites were selected with pyrimethamine and cloned by limiting  
603 dilution and injection into mice. Integration of the construct was confirmed by PCR on  
604 genomic DNA using specific primer combinations listed in **Supplementary Table 7**.  
605 Tagging of *P. berghei* B9 with a triple Flag epitope was achieved by double crossover  
606 homologous recombination with the endogenous *B9* gene locus. For this purpose,  
607 three inserts were amplified by PCR and sequentially inserted in two steps using the  
608 In-Fusion HD Cloning Kit (Clontech). In the first step, a 3' homology 736-bp fragment

609 was cloned into the *NheI* site in a plasmid containing a GFP-2A-hDHFR cassette under  
610 control of the *P. yoelii* HSP70 promoter. In the second step, a 5' homology 759-bp  
611 fragment from B9 ORF and a 789-bp fragment comprising a triple Flag epitope, a  
612 recodonized B9 C-terminus sequence and the 3' UTR of PyB9 were inserted into  
613 *KpnI/EcoRI* sites of the plasmid. Primers used to assemble the B9 tagging construct  
614 and the sequence of the synthetic gene are listed in **Supplementary Table 8**. The  
615 resulting construct was linearized with *KpnI* and *NheI* before transfection of WT *P.*  
616 *berghei* (ANKA) parasites. Recombinant parasites were selected with pyrimethamine  
617 and cloned by limiting dilution and injection into mice. Integration of the construct was  
618 confirmed by PCR on genomic DNA using specific primer combinations listed in  
619 **Supplementary Table 8**.

620

#### 621 **Structure-guided mutagenesis of *P. berghei* B9**

622 Genetic complementation of *PbΔb9* parasites was achieved by double crossover  
623 homologous recombination using a vector containing a hDHFR cassette and a 3'  
624 homology arm corresponding to the 5' sequence of the HSP70 promoter of the GFP  
625 cassette in the *PbΔb9* line. First, an 840-bp fragment including the coding sequence  
626 for *PbB9* N-terminus (amino acids 1-29), and a 1096-bp fragment encoding the C-  
627 terminus (amino acids 647-852) followed by the 3' UTR of *PbB9* were sequentially  
628 inserted into the plasmid, in *KpnI/EcoRI* sites, resulting in the  $\Delta\text{prop}\Delta\text{6cys1}$  construct.  
629 Cloning of a 1950-bp fragment of *PbB9* gene (including the coding sequence for amino  
630 acids 30-646) into *XhoI/KpnI* sites of the  $\Delta\text{prop}\Delta\text{6cys1}$  plasmid resulted in the *PbB9*  
631 construct, encoding the full length *PbB9* protein. Cloning of a 912-bp fragment of *PbB9*  
632 gene (including the coding sequence for amino acids 344-646) into *XhoI/KpnI* sites of  
633 the  $\Delta\text{prop}\Delta\text{6cys1}$  plasmid resulted in the  $\Delta\text{prop}$  construct. Cloning of a 1992-bp  
634 fragment from *PyB9* gene (including the coding sequence for amino acids 30-653 of  
635 *PyB9*) into *XhoI/KpnI* sites of the  $\Delta\text{prop}\Delta\text{6cys1}$  plasmid resulted in the *PyProp6cys1*

636 construct. Cloning of a 948-bp fragment from PyB9 gene (encoding amino acids 30-  
637 342 of PyB9) and a 903-bp fragment from PbB9 gene (encoding amino acids 346-646  
638 of PbB9) into *XhoI/KpnI* sites of the  $\Delta$ prop $\Delta$ 6cys1 plasmid resulted in the PyProp  
639 construct. Cloning of a 1071-bp fragment from PfB9 gene (encoding amino acids 25-  
640 379 of PfB9) and a 903-bp fragment from PbB9 gene (encoding amino acids 346-646  
641 of PbB9) into *XhoI/KpnI* sites of the  $\Delta$ prop $\Delta$ 6cys1 plasmid resulted in the PfProp  
642 construct. The primers used to assemble the constructs for genetic complementation  
643 are listed in **Supplementary Table 9**. The constructs were linearized with *NheI* before  
644 transfection of Pb $\Delta$ b9 purified schizonts. Recombinant parasites were selected with  
645 pyrimethamine. Integration of the constructs was confirmed by PCR on genomic DNA  
646 using specific primer combinations listed in **Supplementary Table 9**.

647

#### 648 **Sporozoite invasion assays**

649 Host cell invasion by GFP-expressing sporozoites was monitored by flow cytometry<sup>52</sup>.  
650 Briefly, hepatoma cells ( $3 \times 10^4$  per well in collagen-coated 96-well plates) were  
651 incubated with sporozoites ( $5 \times 10^3$  to  $1 \times 10^4$  per well). For measurement of cell  
652 traversal activity, sporozoites were incubated with cells in the presence of 0.5 mg/ml  
653 rhodamine-conjugated dextran (Life Technologies). Three hours post-infection, cell  
654 cultures were washed, trypsinized and analysed on a Guava EasyCyte 6/2L bench  
655 cytometer equipped with 488 nm and 532 nm lasers (Millipore), for detection of GFP-  
656 positive cells and dextran-positive cells, respectively. To assess liver stage  
657 development, HepG2 or HepG2/CD81 cells were infected with GFP-expressing  
658 sporozoites and cultured for 24-36 hours before analysis either by FACS or by  
659 fluorescence microscopy, after fixation with 4% PFA and labeling with antibodies  
660 specific for UIS4 (Sicgen).

661

#### 662 **Fluorescence microscopy**

663 To visualize RON4-mCherry in transgenic parasites, purified schizonts and  
664 sporozoites were deposited on poly-L-lysine coated coverslips and fixed with 4% PFA.  
665 GFP and mCherry images were captured on a Zeiss Axio Observer.Z1 fluorescence  
666 microscope equipped with a Plan- Apochromat 63×/1.40 Oil DIC M27 objective.  
667 Images acquired using the Zen 2012 software (Zeiss) were processed with ImageJ or  
668 Photoshop CS6 software (Adobe) for adjustment of contrast. To quantify rhoptry  
669 discharge, RON4-mCherry expressing PbGFP, Pb $\Delta$ b9 or Pb $\Delta$ p36 sporozoites were  
670 incubated with HepG2 cells for 3 h at 37°C. After extensive washes to remove  
671 extracellular parasites, cultures were trypsinized and cells were examined under a  
672 fluorescence microscope to assess for mCherry fluorescence in GFP-expressing  
673 intracellular sporozoites. At least 50 intracellular parasites in triplicate wells were  
674 examined for each parasite line. The percentage of rhoptry discharge was defined as  
675 the proportion of intracellular sporozoites without detectable RON4-mCherry signal.  
676 For immunofluorescence analysis of B9-Flag parasites, sporozoites collected from  
677 infected mosquito salivary glands were deposited on poly-L-lysine coated coverslips,  
678 fixed with 4% PFA and permeabilized with 1% Triton X-100. Parasites were labelled  
679 with anti-Flag mouse antibodies (M2 clone, Sigma) and AlexaFluor 594-conjugated  
680 secondary antibodies (Life Technologies). Nuclei were stained with Hoechst 77742.  
681 For double labelling of B9 and AMA1, we used anti-Flag mouse antibodies (M2 clone,  
682 Sigma) and anti-AMA1 rat antibodies<sup>53</sup> (clone 28G2, Bei Resources), followed by  
683 atto647N-conjugated anti-mouse and Alexa-594-conjugated anti-rat antibodies.  
684 Coverslips were mounted on glass slides with ProLong™ Diamond Antifade Mountant  
685 (Life Technologies). STED imaging was carried out with a 93x glycerol-immersion  
686 objective (NA 1.3) on a Leica TCS SP8 STEDX microscope equipped with a White  
687 Light Laser. AlexaFluor 594 and atto647N-labelled compartments were excited at 590  
688 or 644 nm, respectively, and depleted with a pulsed 775 nm STED laser. Image frames  
689 were acquired sequentially frame by frame at a scan speed of 200 lines/s with an  
690 optimal pixel size and a line average of 4 to 8. Deconvolution of STED data was

691 performed using the default deconvolution settings in Huygens Professional  
692 Deconvolution software v18.10 (Scientific Volume Imaging) that were estimated from  
693 the metadata. Brightness and Contrast were adjusted using Fiji<sup>54</sup>.

694

#### 695 **Western blot**

696 B9-Flag sporozoites were isolated from the salivary glands of infected mosquitoes and  
697 resuspended in 1X PBS. Microneme secretion was stimulated by incubation for 15 min  
698 at 37°C in a buffer containing 1% BSA and 1% ethanol, as described<sup>55</sup>. Pellet and  
699 supernatant fractions were then isolated from activated and non-activated (control)  
700 sporozoites, resuspended in Laemmli buffer and analysed by SDS-PAGE under non-  
701 reducing conditions. Western blotting was performed using primary antibodies against  
702 the Flag epitope (M2 clone, Sigma) or against GFP (loading control), and secondary  
703 antibodies coupled with Alexa Fluor 680. Membranes were then analysed using the  
704 InfraRed Odyssey system (Licor).

705

#### 706 **Heterologous expression of *Plasmodium* proteins in Hepa1-6 cells**

707 Two vectors for mammalian cell expression were first assembled in a pEF1α-AcGFP1-  
708 N1 backbone. The first one (mCherry) encodes a cassette consisting of the signal  
709 peptide from bee venom melittin (BVM), a V5 epitope, the transmembrane and C-  
710 terminus of mouse Glycophorin A (GYPA), mCherry, Myc and 6xHis tags. In the  
711 second one (GFP), the cassette encodes the signal peptide from BVM, a 3xFlag  
712 epitope, the transmembrane and C-terminus of mouse GYPA, and GFP. Codon-  
713 optimized versions of PbB9 propeller domain (amino acids 31-348), PbP36 (amino  
714 acids 67-352) or PbP52 (amino acids 33-302) were inserted in the mCherry and/or  
715 GFP plasmids between the signal peptide and the Flag or V5 epitope tag. Two  
716 additional constructs for expression of soluble PbP36 and PbP52 were obtained by  
717 adding a stop codon immediately after the 3xFlag epitope. The construct cassette  
718 sequences are indicated in **Supplementary Table 10**. High concentration plasmid

719 solutions were produced using XL1-Blue Competent Cells (Agilent) and plasmid  
720 extraction was performed using Qiagen Plasmid Maxikit (Qiagen) according to the  
721 manufacturer's recommendations. Plasmid transfection was performed in Hepa1-6  
722 cells using the Lipofectamine 2000 reagent (Life Technologies) according to the  
723 manufacturer's specifications. Following plasmid transfection, cells were cultured for  
724 24 h before lysis in a buffer containing 1% NP40. Protein extracts were then subjected  
725 to immunoprecipitation using agarose beads coupled with anti-RFP nanobodies  
726 (Chromotek). Eluates were collected and analysed by western blot, using anti-Flag  
727 antibodies. Membranes were analysed using the InfraRed Odyssey system (Licor).

728

### 729 **B9 immunoprecipitation and mass spectrometry**

730 Freshly dissected B9-Flag sporozoites were lysed on ice for 30 min in a lysis buffer  
731 containing 0.5% w/v NP40 and protease inhibitors. After centrifugation (15,000 × g, 15  
732 min, 4°C), supernatants were incubated with protein G-conjugated sepharose for  
733 preclearing overnight. Precleared lysates were subjected to B9-Flag  
734 immunoprecipitation using Anti-FLAG M2 Affinity Gel (Sigma) for 2h at 4°C, according  
735 to the manufacturer's protocol. PbGFP parasites with untagged B9 were used as a  
736 control and treated in the same fashion. After washes, proteins on beads were eluted  
737 in 2X Laemmli and denatured (95°C, 5min). After centrifugation, supernatants were  
738 collected for further analysis. Samples were subjected to a short SDS-PAGE migration,  
739 and gel pieces were processed for protein trypsin digestion by the DigestProMSi robot  
740 (Intavis), as described<sup>21</sup>. Peptide samples were analysed on a timsTOF PRO mass  
741 spectrometer (Bruker) coupled to the nanoElute HPLC, as described<sup>21</sup>. Mascot generic  
742 files were processed with X!Tandem pipeline (version 0.2.36) using the  
743 PlasmoDB\_PB\_39\_PbergheiANKA database, as described<sup>21</sup>.

744

### 745 **Structural analyses of B9 propeller**



746 The secondary structure of PfB9 was predicted by hydrophobic cluster analysis<sup>56</sup> and  
747 using PSIPRED 4.0<sup>57</sup>. Conserved domains were searched using InterPro<sup>58</sup> and  
748 HHpred<sup>59</sup>. Glycosylphosphatidylinositol (GPI) anchors were predicted using the  
749 NetGPI tool (<https://services.healthtech.dtu.dk/service.php?NetGPI>)<sup>60</sup>. Intrinsic  
750 disorder prediction was made using the IUPred2A web server  
751 (<https://iupred2a.elte.hu/>)<sup>61</sup>. The homology model of PfB9 propeller (amino acids 26 to  
752 386) was built with the X-ray structure at 2.4 Å resolution of CyRPA from *P. falciparum*  
753 (PDB ID: 5TIH<sup>44</sup>) using the Robetta web server<sup>62</sup> (default parameters). The model was  
754 refined and energy-minimized using respectively GalaxyRefine<sup>63</sup> and Yasara<sup>64</sup>, then  
755 validated using MolProbity<sup>65</sup> and Prosa II<sup>66</sup> (**Supplementary Fig. 5**). Structural  
756 alignment of PfB9 propeller and CyRPA was performed using the *MatchMaker* function  
757 in UCSF Chimera<sup>67</sup>. Protein electrostatic surface potential was calculated using  
758 Adaptive Poisson-Boltzmann Solver (APBS<sup>68</sup>), after determining the per-atom charge  
759 and radius of the structure with PDB2PQR v.2.1.1<sup>69</sup>. The Poisson-Boltzmann equation  
760 was solved at 298 K using a grid-based method, with solute and solvent dielectric  
761 constants fixed at 2 and 78.5, respectively. We used a scale of  $-5 kT/e$  to  $+5 kT/e$  to  
762 map the electrostatic surface potential in a radius of 1.4 Å. All tertiary structures were  
763 visualized and drawn using UCSF Chimera<sup>67</sup>.

764

### 765 **Evolutionary analysis of B9 and CyRPA**

766 The amino acid sequence of PfB9 (PlasmoDB code: PF3D7\_0317100) and CyRPA  
767 (PF3D7\_0423800) were queried against the PlasmoDB database<sup>70</sup> (release 46) and  
768 the NCBI non-redundant protein database using blastp searches (BLOSUM62 scoring  
769 matrix). Twenty-three B9 and eighteen CyRPA sequences were retrieved from distinct  
770 *Plasmodium* species. Protein sequence alignments were generated using MAFFT  
771 version 7 (default parameters<sup>71</sup>). Output alignments were visually inspected and  
772 manually edited with BioEdit v7.2.5. Amino acid positions containing gaps in at least  
773 30% of all sequences were removed. Phylogenetic relationships of B9 and CyRPA

774 amino acid sequences were inferred using the maximum-likelihood method  
775 implemented in PhyML v3.0<sup>72</sup>, after determining the best-fitting substitution model  
776 using the Smart Model Selection (SMS) package<sup>73</sup>. The nearest neighbour interchange  
777 approach was chosen for tree improving, and branch supports were estimated using  
778 the approximate likelihood ratio aLRT SH-like method<sup>74</sup>. Site-specific substitution rates  
779 were estimated by considering their spatial correlation in tertiary structure using the  
780 GP4Rate tool<sup>75</sup>. GP4rate requires an amino acid sequence alignment, a phylogenetic  
781 tree and a protein tertiary structure to estimate the conservation level during species  
782 evolution and the characteristic length scale (in Å) of spatially correlated site-specific  
783 substitution rates. For B9, we used the refined tertiary structure predicted by Robetta,  
784 while we chose the X-ray structure resolved at 2.4 Å resolution for CyRPA (PDB ID:  
785 5TIH<sup>44</sup>).

786

### 787 **Statistical analysis**

788 Statistical significance of infection data was assessed by Mann-Whitney test or One-  
789 way ANOVA followed by Dunnett's multiple comparisons test. Survival curves were  
790 analyzed using the Log rank Mantel-Cox test. All statistical tests were computed with  
791 GraphPad Prism 5 (GraphPad Software). *In vitro* experiments were performed with a  
792 minimum of three technical replicates per experiment. Statistical analyses for structural  
793 modelling were performed using the computing environment R version 3.5.2 (R  
794 Foundation for Statistical Computing).

795

796

797 **ACKNOWLEDGEMENTS**

798 We thank Jean-François Franetich, Maurel Tefit and Thierry Houpert for rearing of  
799 mosquitoes. The following reagent was obtained through BEI Resources, NIAID, NIH:  
800 Monoclonal Anti-Plasmodium Apical Membrane Antigen 1, Clone 28G2 (produced in  
801 vitro), MRA-897A, contributed by Alan W. Thomas. This work was funded by grants  
802 from the Laboratoire d'Excellence ParaFrap (ANR-11-LABX-0024), the Agence  
803 Nationale de la Recherche (ANR-16-CE15-0004) and the Fondation pour la  
804 Recherche Médicale (EQU201903007823). The authors acknowledge the Conseil  
805 Régional d'Ile-de-France, Sorbonne Université, the National Institute for Health and  
806 Medical Research (INSERM) and the Biology, Health and Agronomy Infrastructure  
807 (IBiSA) for funding the timsTOF PRO. ML was supported by a 'DIM 1Health' doctoral  
808 fellowship awarded by the Conseil Régional d'Ile-de- France.

809

810

811

812 **REFERENCES**

- 813 1. World Health Organization. World Malaria Report 2019. 1–232 (2019).
- 814 2. Efficacy and safety of RTS,S/AS01 malaria vaccine with or without a booster  
815 dose in infants and children in Africa: Final results of a phase 3, individually  
816 randomised, controlled trial. *Lancet* **386**, 31–45 (2015).
- 817 3. Risco-Castillo, V. *et al.* Malaria sporozoites traverse host cells within transient  
818 vacuoles. *Cell Host Microbe* **18**, 593–603 (2015).
- 819 4. Loubens, M. *et al.* Plasmodium sporozoites on the move: switching from cell  
820 traversal to productive invasion of hepatocytes . *Mol. Microbiol.* (2020).  
821 doi:10.1111/mmi.14645
- 822 5. Silvie, O. *et al.* Hepatocyte CD81 is required for Plasmodium falciparum and  
823 Plasmodium yoelii sporozoite infectivity. *Nat. Med.* **9**, 93–96 (2003).
- 824 6. Manzoni, G. *et al.* Plasmodium P36 determines host cell receptor usage  
825 during sporozoite invasion. *Elife* **6**, e25903 (2017).
- 826 7. Silvie, O., Franetich, J. F., Boucheix, C., Rubinstein, E. & Mazier, D.  
827 Alternative invasion pathways for plasmodium berghei sporozoites. *Int. J.*  
828 *Parasitol.* **37**, 173–182 (2007).
- 829 8. Ishino, T., Chinzei, Y. & Yuda, M. Two proteins with 6-cys motifs are required  
830 for malarial parasites to commit to infection of the hepatocyte. *Mol. Microbiol.*  
831 **58**, 1264–1275 (2005).
- 832 9. Labaied, M. *et al.* Plasmodium yoelii sporozoites with simultaneous deletion of  
833 P52 and P36 are completely attenuated and confer sterile immunity against  
834 infection. *Infect. Immun.* **75**, 3758–3768 (2007).
- 835 10. van Schaijk, B. C. *et al.* Gene disruption of Plasmodium falciparum p52 results  
836 in attenuation of malaria liver stage development in cultured primary human  
837 hepatocytes. *PLoS One* **3**, e3549 (2008).
- 838 11. Arredondo, S. A. *et al.* The Micronemal Plasmodium Proteins P36 and P52 Act  
839 in Concert to Establish the Replication-Permissive Compartment Within

- 840            Infected Hepatocytes. **8**, 413 (2018).
- 841    12.    Kaushansky, A. *et al.* Malaria parasites target the hepatocyte receptor EphA2  
842            for successful host infection. *Science* **350**, 1089–1092 (2015).
- 843    13.    Langlois, A. C., Marinach, C., Manzoni, G. & Silvie, O. Plasmodium  
844            sporozoites can invade hepatocytic cells independently of the ephrin receptor  
845            A2. *PLoS One* **13**, e0200032 (2018).
- 846    14.    Arredondo, S. A. & Kappe, S. H. I. The s48/45 six-cysteine proteins: mediators  
847            of interaction throughout the Plasmodium life cycle. *International Journal for*  
848            *Parasitology* **47**, 409–423 (2017).
- 849    15.    Annoura, T. *et al.* Two Plasmodium 6-Cys family-related proteins have distinct  
850            and critical roles in liver-stage development. *FASEB J.* **28**, 2158–2170 (2014).
- 851    16.    Taechalerpaisarn, T. *et al.* Biochemical and functional analysis of two  
852            plasmodium falciparum blood-stage 6-Cys proteins: P12 and P41. *PLoS One*  
853            **7**, (2012).
- 854    17.    Kennedy, A. T. *et al.* Recruitment of Factor H as a Novel Complement  
855            Evasion Strategy for Blood-Stage Plasmodium falciparum Infection . *J.*  
856            *Immunol.* **196**, (2016).
- 857    18.    Kumar, N. Target antigens of malaria transmission blocking immunity exist as  
858            a stable membrane bound complex. *Parasite Immunol.* **9**, 321–335 (1987).
- 859    19.    Simon, N. *et al.* Sexual stage adhesion proteins form multi-protein complexes  
860            in the malaria parasite Plasmodium falciparum. *J. Biol. Chem.* **284**, (2009).
- 861    20.    Molina-Cruz, A. *et al.* Plasmodium falciparum evades immunity of anopheline  
862            mosquitoes by interacting with a Pfs47 midgut receptor. *Proc. Natl. Acad. Sci.*  
863            *U. S. A.* **117**, (2020).
- 864    21.    Hamada, S. *et al.* In-depth proteomic analysis of Plasmodium berghei  
865            sporozoites using trapped ion mobility spectrometry with parallel  
866            accumulation-serial fragmentation. *Proteomics* **21**, (2021).
- 867    22.    Lasonder, E. *et al.* Proteomic profiling of Plasmodium sporozoite maturation

- 868 identifies new proteins essential for parasite development and infectivity. *PLoS*  
869 *Pathog.* **4**, (2008).
- 870 23. Lindner, S. E. *et al.* Total and putative surface proteomics of malaria parasite  
871 salivary gland sporozoites. *Mol Cell Proteomics* **12**, 1127–1143 (2013).
- 872 24. Swearingen, K. E. *et al.* Proteogenomic analysis of the total and surface-  
873 exposed proteomes of *Plasmodium vivax* salivary gland sporozoites. *PLoS*  
874 *Negl. Trop. Dis.* **11**, e0005791 (2017).
- 875 25. Manzoni, G. *et al.* A rapid and robust selection procedure for generating drug-  
876 selectable marker-free recombinant malaria parasites. *Sci Rep* **4**, 4760 (2014).
- 877 26. Lindner, S. E. *et al.* Total and putative surface proteomics of malaria parasite  
878 salivary gland sporozoites. *Mol. Cell. Proteomics* **12**, 1127–1143 (2013).
- 879 27. Swearingen, K. E. *et al.* Interrogating the *Plasmodium* Sporozoite Surface:  
880 Identification of Surface-Exposed Proteins and Demonstration of Glycosylation  
881 on CSP and TRAP by Mass Spectrometry-Based Proteomics. *PLoS Pathog.*  
882 **12**, e1005606 (2016).
- 883 28. Treeck, M., Sanders, J. L., Elias, J. E. & Boothroyd, J. C. The  
884 Phosphoproteomes of *Plasmodium falciparum* and *Toxoplasma gondii* Reveal  
885 Unusual Adaptations Within and Beyond the Parasites' Boundaries. *Cell Host*  
886 *Microbe* **10**, 410–419 (2011).
- 887 29. Oehring, S. C. *et al.* Organellar proteomics reveals hundreds of novel nuclear  
888 proteins in the malaria parasite *Plasmodium falciparum*. *Genome Biol.* **13**,  
889 (2012).
- 890 30. Lasonder, E. *et al.* Integrated transcriptomic and proteomic analyses of *P.*  
891 *falciparum* gametocytes: molecular insight into sex-specific processes and  
892 translational repression. *Nucleic Acids Res.* **44**, 6087–101 (2016).
- 893 31. Pease, B. N. *et al.* Global analysis of protein expression and phosphorylation  
894 of three stages of *Plasmodium falciparum* intraerythrocytic development. *J.*  
895 *Proteome Res.* **12**, 4028–45 (2013).

- 896 32. Silvestrini, F. *et al.* Protein export marks the early phase of gametocytogenesis  
897 of the human malaria parasite *Plasmodium falciparum*. *Mol. Cell. Proteomics*  
898 **9**, 1437–48 (2010).
- 899 33. Khan, S. M. *et al.* Proteome Analysis of Separated Male and Female  
900 Gametocytes Reveals Novel Sex-Specific *Plasmodium* Biology. *Cell* **121**, 675–  
901 687 (2005).
- 902 34. Lindner, S. E. *et al.* Transcriptomics and proteomics reveal two waves of  
903 translational repression during the maturation of malaria parasite sporozoites.  
904 *Nat. Commun.* **10**, 4964 (2019).
- 905 35. van Dijk, M. R. *et al.* Three members of the 6-cys protein family of  
906 *Plasmodium* play a role in gamete fertility. *PLoS Pathog.* **6**, e1000853 (2010).
- 907 36. Bushell, E. *et al.* Functional Profiling of a *Plasmodium* Genome Reveals an  
908 Abundance of Essential Genes. *Cell* **170**, 260-272.e8 (2017).
- 909 37. Manzoni, G., Briquet, S. & Risco-Castillo, V. A rapid and robust selection  
910 procedure for generating drug-selectable marker-free recombinant malaria  
911 parasites. *Sci. Rep.* **99210**, 1–10 (2014).
- 912 38. Risco-Castillo, V. Malaria sporozoites traverse cells within transient vacuoles.  
913 *Cell Host Microbe* (2015).
- 914 39. Mueller, A. K., Labaled, M., Kappe, S. H. I. & Matuschewski, K. Genetically  
915 modified *Plasmodium* parasites as a protective experimental malaria vaccine.  
916 *Nature* **433**, 164–167 (2005).
- 917 40. Silvie, O. *et al.* Expression of human CD81 differently affects host cell  
918 susceptibility to malaria sporozoites depending on the *Plasmodium* species.  
919 *Cell. Microbiol.* **8**, 1134–1146 (2006).
- 920 41. Risco-Castillo, V. *et al.* CD81 is required for rhoptry discharge during host cell  
921 invasion by *Plasmodium yoelii* sporozoites. *Cell. Microbiol.* **16**, 1533–1548  
922 (2014).
- 923 42. Volz, J. C. *et al.* Essential Role of the PfRh5/PfRipr/CyRPA Complex during

- 924 Plasmodium falciparum Invasion of Erythrocytes. *Cell Host Microbe* **20**, 60–71  
925 (2016).
- 926 43. Wong, W. *et al.* Structure of Plasmodium falciparum Rh5–CyRPA–Ripr  
927 invasion complex. *Nature* **565**, 118–121 (2019).
- 928 44. Chen, L. *et al.* Structural basis for inhibition of erythrocyte invasion by  
929 antibodies to plasmodium falciparum protein CyRPA. *Elife* **6**, (2017).
- 930 45. Reddy, K. S. *et al.* Multiprotein complex between the GPI-anchored CyRPA  
931 with PfRH5 and PfRipr is crucial for Plasmodium falciparum erythrocyte  
932 invasion. *Proc. Natl. Acad. Sci. U. S. A.* **112**, (2015).
- 933 46. Galaway, F., Yu, R., Constantinou, A., Prugnolle, F. & Wright, G. J.  
934 Resurrection of the ancestral RH5 invasion ligand provides a molecular  
935 explanation for the origin of P. Falciparum malaria in humans. *PLoS Biol.* **17**,  
936 (2019).
- 937 47. Dreyer, A. M., Beauchamp, J., Matile, H. & Pluschke, G. An efficient system to  
938 generate monoclonal antibodies against membrane-associated proteins by  
939 immunisation with antigen-expressing mammalian cells. *BMC Biotechnol.* **10**,  
940 (2010).
- 941 48. Jumper, J. *et al.* Highly accurate protein structure prediction with AlphaFold.  
942 *Nature* **596**, (2021).
- 943 49. Ramakrishnan, C. *et al.* Laboratory maintenance of rodent malaria parasites.  
944 *Methods Mol Biol* **923**, 51–72 (2013).
- 945 50. Janse, C. J., Ramesar, J. & Waters, A. P. High-efficiency transfection and  
946 drug selection of genetically transformed blood stages of the rodent malaria  
947 parasite Plasmodium berghei. *Nat. Protoc.* **1**, 346–356 (2006).
- 948 51. Silvie, O., Goetz, K. & Matuschewski, K. A sporozoite asparagine-rich protein  
949 controls initiation of Plasmodium liver stage development. *PLoS Pathog.* **4**,  
950 (2008).
- 951 52. Prudêncio, M., Rodrigues, C. D., Ataíde, R. & Mota, M. M. Dissecting in vitro



- 952 host cell infection by Plasmodium sporozoites using flow cytometry. *Cell.*  
953 *Microbiol.* **10**, 218–24 (2008).
- 954 53. Narum, D. L. & Thomas, A. W. Differential localization of full-length and  
955 processed forms of PF83/AMA-1 an apical membrane antigen of Plasmodium  
956 falciparum merozoites. *Mol. Biochem. Parasitol.* **67**, (1994).
- 957 54. Schindelin, J. *et al.* Fiji: An open-source platform for biological-image analysis.  
958 *Nature Methods* **9**, (2012).
- 959 55. Brown, K. M., Sibley, L. D. & Lourido, S. High-Throughput Measurement of  
960 Microneme Secretion in Toxoplasma gondii. in *Methods in Molecular Biology*  
961 **2071**, (2020).
- 962 56. Callebaut, I. *et al.* Deciphering protein sequence information through  
963 hydrophobic cluster analysis (HCA): Current status and perspectives. *Cellular*  
964 *and Molecular Life Sciences* **53**, 621–645 (1997).
- 965 57. Buchan, D. W. A. & Jones, D. T. The PSIPRED Protein Analysis Workbench:  
966 20 years on. *Nucleic Acids Res.* **47**, W402–W407 (2019).
- 967 58. Mulder, N. J. *et al.* InterPro: an integrated documentation resource for protein  
968 families, domains and functional sites. *Brief. Bioinform.* **3**, 225–235 (2002).
- 969 59. Söding, J., Biegert, A. & Lupas, A. N. The HHpred interactive server for protein  
970 homology detection and structure prediction. *Nucleic Acids Res.* **33**, (2005).
- 971 60. Gíslason, M. H., Nielsen, H., Almagro Armenteros, J. J. & Johansen, A. R.  
972 Prediction of GPI-anchored proteins with pointer neural networks. *Curr. Res.*  
973 *Biotechnol.* **3**, (2021).
- 974 61. Mészáros, B., Erdős, G. & Dosztányi, Z. IUPred2A: Context-dependent  
975 prediction of protein disorder as a function of redox state and protein binding.  
976 *Nucleic Acids Res.* **46**, (2018).
- 977 62. (No Title). Available at: <https://robeta.bakerlab.org/>. (Accessed: 4th January  
978 2021)
- 979 63. Heo, L., Park, H. & Seok, C. GalaxyRefine: Protein structure refinement driven

- 980 by side-chain repacking. *Nucleic Acids Res.* **41**, (2013).
- 981 64. Krieger, E. *et al.* Improving physical realism, stereochemistry, and side-chain  
982 accuracy in homology modeling: Four approaches that performed well in  
983 CASP8. *Proteins: Structure, Function and Bioinformatics* **77**, 114–122 (2009).
- 984 65. Chen, V. B. *et al.* MolProbity: All-atom structure validation for macromolecular  
985 crystallography. *Acta Crystallogr. Sect. D Biol. Crystallogr.* **66**, 12–21 (2010).
- 986 66. Wiederstein, M. & Sippl, M. J. ProSA-web: Interactive web service for the  
987 recognition of errors in three-dimensional structures of proteins. *Nucleic Acids*  
988 *Res.* **35**, (2007).
- 989 67. Pettersen, E. F. *et al.* UCSF Chimera - A visualization system for exploratory  
990 research and analysis. *J. Comput. Chem.* **25**, 1605–1612 (2004).
- 991 68. Baker, N. A., Sept, D., Joseph, S., Holst, M. J. & McCammon, J. A.  
992 Electrostatics of nanosystems: Application to microtubules and the ribosome.  
993 *Proc. Natl. Acad. Sci. U. S. A.* **98**, 10037–10041 (2001).
- 994 69. Dolinsky, T. J., Nielsen, J. E., McCammon, J. A. & Baker, N. A. PDB2PQR: An  
995 automated pipeline for the setup of Poisson-Boltzmann electrostatics  
996 calculations. *Nucleic Acids Res.* **32**, W665-7 (2004).
- 997 70. Aurrecochea, C. *et al.* PlasmoDB: A functional genomic database for malaria  
998 parasites. *Nucleic Acids Res.* **37**, (2009).
- 999 71. Katoh, K. & Standley, D. M. MAFFT Multiple Sequence Alignment Software  
1000 Version 7: Improvements in Performance and Usability. *Mol. Biol. Evol.* **30**,  
1001 772–780 (2013).
- 1002 72. Guindon, S. *et al.* New Algorithms and Methods to Estimate Maximum-  
1003 Likelihood Phylogenies: Assessing the Performance of PhyML 3.0. *Syst. Biol.*  
1004 **59**, 307–321 (2010).
- 1005 73. Lefort, V., Longueville, J.-E. & Gascuel, O. SMS: Smart Model Selection in  
1006 PhyML. *Mol. Biol. Evol.* **34**, 2422–2424 (2017).
- 1007 74. Anisimova, M., Bielawski, J. P. & Yang, Z. Accuracy and power of the

1008            likelihood ratio test in detecting adaptive molecular evolution. *Mol. Biol. Evol.*  
1009            **18**, 1585–1592 (2001).  
1010    75.    Huang, Y. F. & Golding, G. B. Phylogenetic Gaussian Process Model for the  
1011            Inference of Functionally Important Regions in Protein Tertiary Structures.  
1012            *PLoS Comput. Biol.* **10**, (2014).  
1013  
1014  
1015

1016 SUPPLEMENTARY MATERIAL

Fig S1 (part 1)

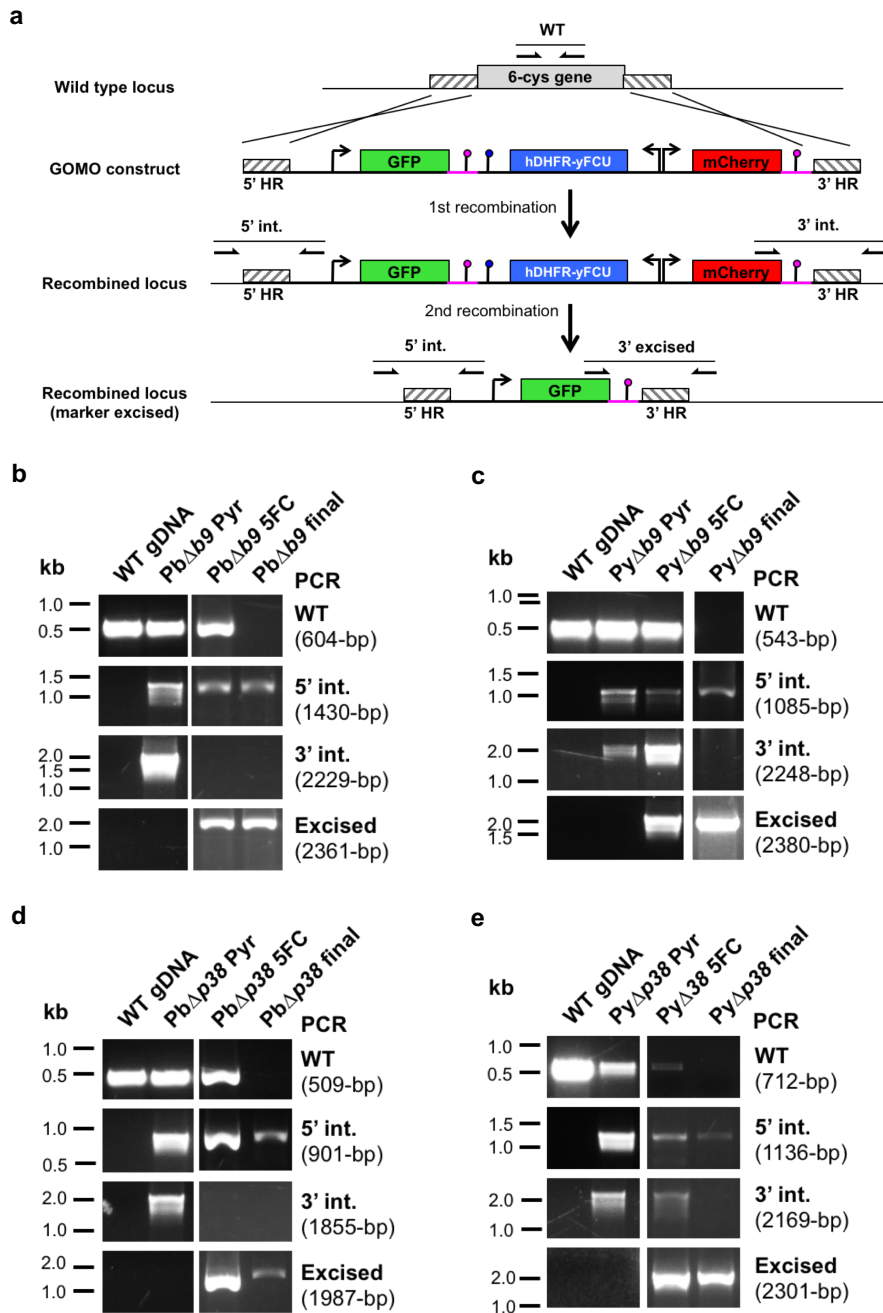

1017

Fig S1 (part 2)

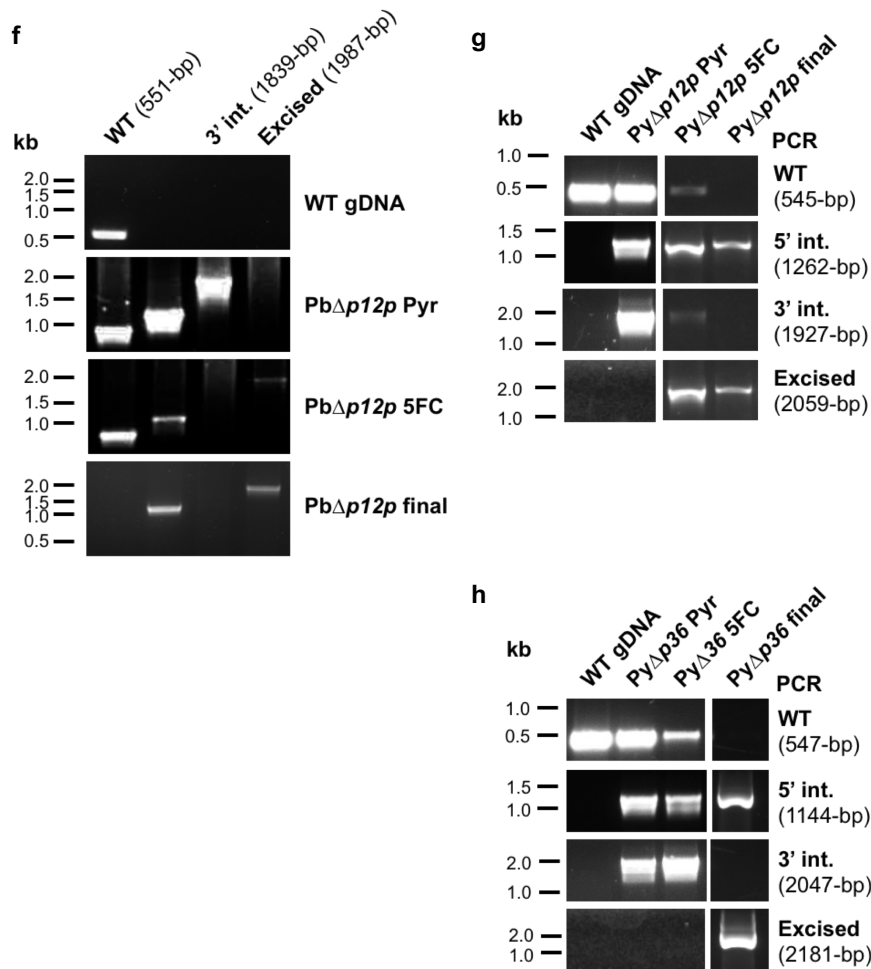

1018  
1019  
1020  
1021  
1022  
1023  
1024  
1025  
1026  
1027  
1028  
1029  
1030  
1031  
1032  
1033  
1034  
1035  
1036  
1037  
1038  
1039

**Supplementary Figure 1. Generation of 6-cys knockout parasite lines in *P. berghei* and *P. yoelii*.** **a**, Replacement strategy to delete 6-cys candidate genes. The wild-type locus of 6-cys genes was targeted with a GOMO-GFP replacement plasmid containing a 5' and a 3' homologous sequence inserted on each side of a GFP/hDHFR-yFCU/mCherry triple cassette. Upon double crossover recombination, the gene of interest is replaced by the plasmid cassettes. Subsequent recombination between the two identical PbDHFR/TS 3' UTR sequences (pink lollipop) results in excision of hDHFR-yFCU and mCherry. Genotyping primers and expected PCR fragments are indicated by arrows and lines, respectively. **b–h**, Genotyping of WT and PbΔb9 (**b**), PyΔb9 (**c**), PbΔp38 (**d**), PyΔp38 (**e**), PbΔp12p (**f**), PbΔp12p (**g**) and PbΔp36 (**h**) parasites, recovered after positive selection with pyrimethamine (Pyr), negative selection with 5-fluorocytosine (5FC), and parasite sorting by flow cytometry (final). Parasite genomic DNA was analyzed by PCR using primer combinations specific for the unmodified locus (WT), the 5' integration (5'int.), 3' integration (3'int.) and 3' marker excision (excised) events. The absence of amplification with primer combinations specific for the WT locus (WT) and the non-excised integrated construct (3' integration) confirms that the final populations contain pure knockout drug-selectable marker-free parasites.

**Fig S2**

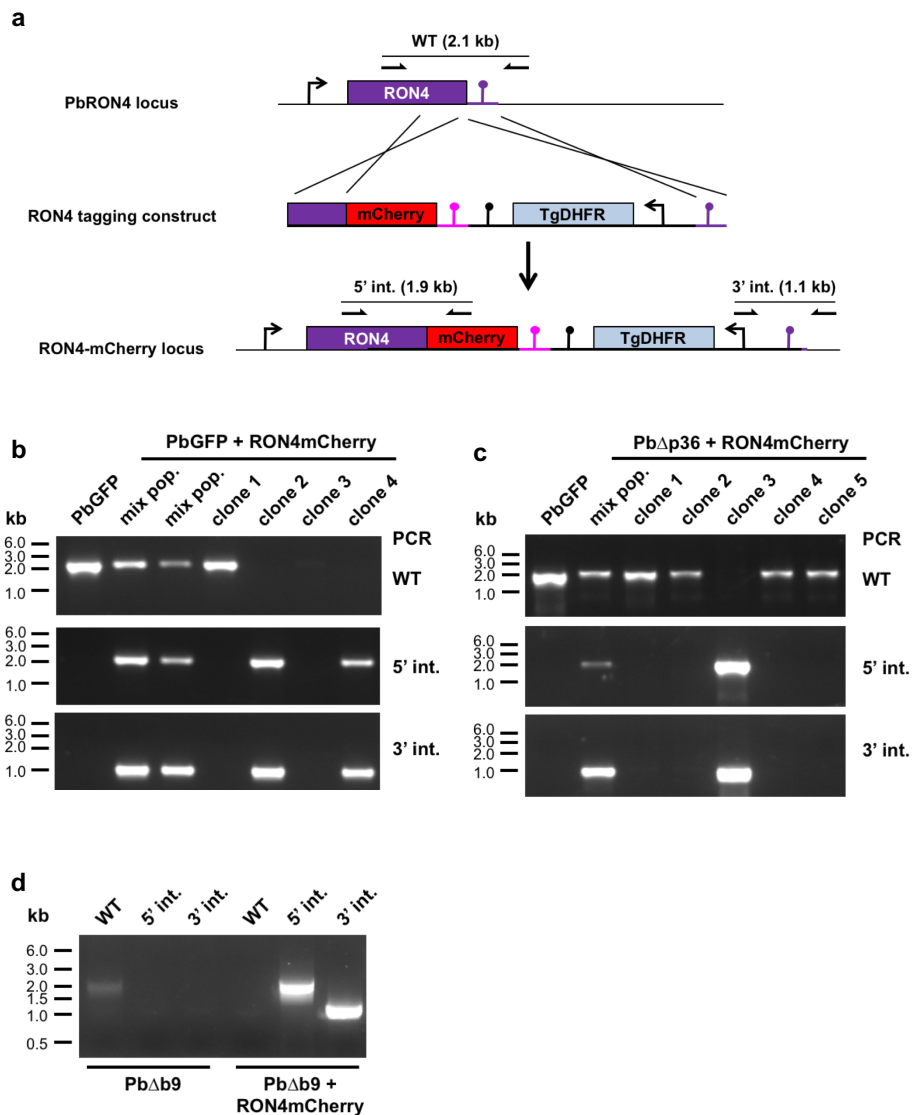

1040  
1041  
1042  
1043  
1044  
1045  
1046  
1047  
1048  
1049  
1050  
1051  
1052  
1053  
1054  
1055  
1056

**Supplementary Figure 2. Generation of RON4-mCherry expressing parasites.** **a**, Strategy used to tag RON4 with mCherry by double crossover homologous recombination in PbGFP, Pb $\Delta p36$  and Pb $\Delta b9$  parasites. The *P. berghei* RON4 locus was targeted with a tagging construct containing a 5' homology fragment coding the C-terminal part of RON4, fused in frame to the mCherry coding sequence and followed by the 3' UTR of *P. berghei* DHFR (pink lollipop), a TgDHFR/TS selection cassette, and a 3' homology fragment corresponding to RON4 3'UTR (purple lollipop). Upon a double crossover event, the endogenous RON4 gene is replaced by a single mCherry-tagged RON4 copy. Genotyping primers and expected PCR fragments are indicated by arrows and lines, respectively. **b-d**, Correct construct integration was confirmed by analytical PCR using primers specific for the unmodified locus (WT) or for the 5' and 3' recombination events (5' int. and 3' int., respectively) at the RON4 locus. The absence of amplification with the WT primer combination confirms the purity of the transgenic population in PbGFP/RON4-mCherry clones 2 and 4 (**b**), Pb $\Delta p36$ /RON4-mCherry clone 3 (**c**) and Pb $\Delta b9$ /RON4-mCherry (**d**).

Fig S3

a

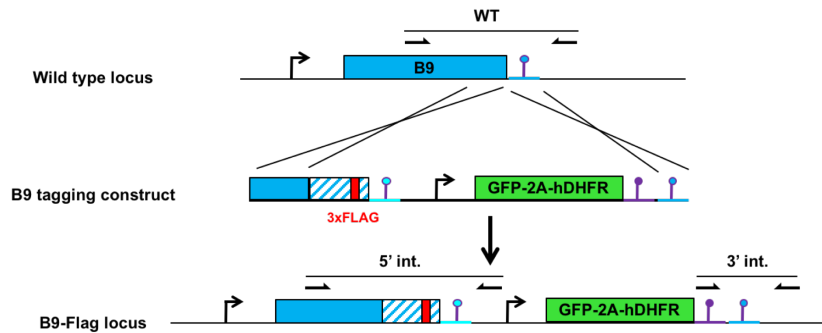

b

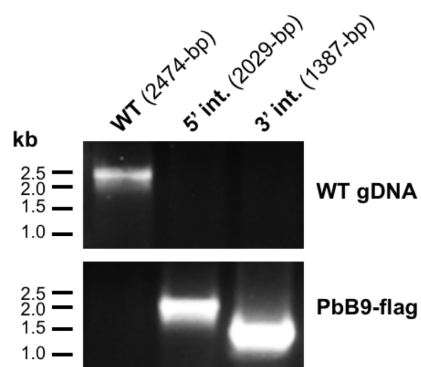

1057  
1058  
1059  
1060  
1061  
1062  
1063  
1064  
1065  
1066  
1067  
1068  
1069  
1070  
1071

**Supplementary Figure 3. Genetic tagging of B9 in *P. berghei*.** **a**, Strategy used to tag B9 with a triple Flag epitope by double crossover homologous recombination in *P. berghei* WT parasites. The *P. berghei* B9 locus was targeted with a tagging construct containing a 5' homology fragment from PbB9 ORF, a recodoned C-terminal sequence of B9 (blue and white striped) with a 3xFlag sequence inserted (red), the 3' UTR of *PyB9* (cyan lollipop), a GFP-2A-hDHFR cassette, and a 3' homology fragment corresponding to *PbB9* 3'UTR (blue lollipop). Upon a double crossover event, the endogenous B9 gene is replaced by a single Flag-tagged B9 copy. Genotyping primers and expected PCR fragments are indicated by arrows and lines, respectively. **b**, Correct construct integration was confirmed by analytical PCR using primers specific for the unmodified locus (WT) or for the 5' and 3' recombination events (5' int. and 3' int., respectively) at the B9 locus. The absence of amplification with the WT primer combination confirms the purity of the transgenic population in PbB9-Flag parasites.

**Fig S4**

**a**

**Hydrophobic Cluster Analysis**

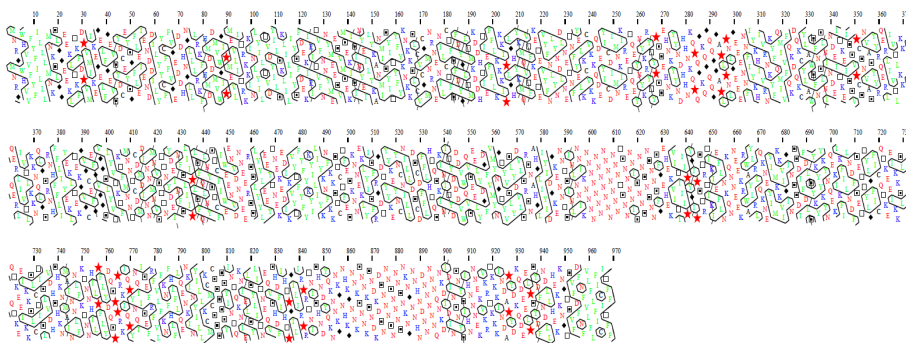

**b**

**PSIPRED secondary structure prediction**

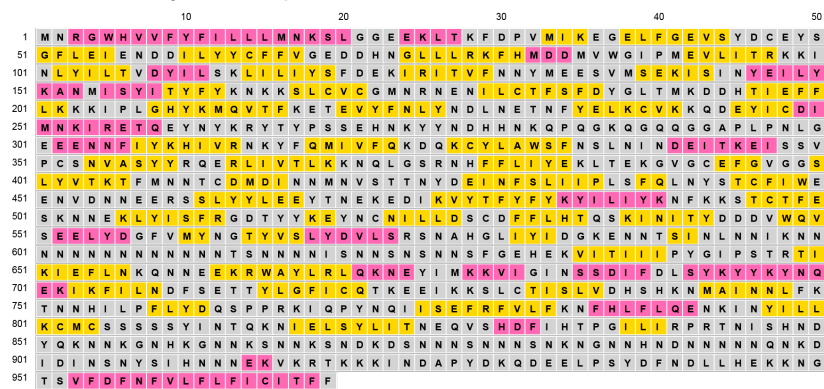

**c**

**Intrinsic disorder prediction**

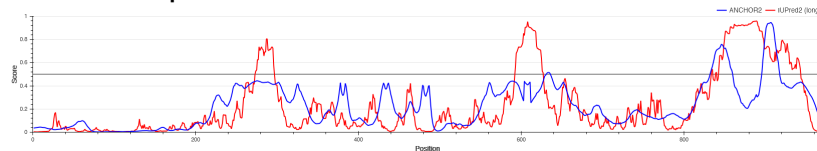

1072  
1073  
1074  
1075  
1076  
1077  
1078  
1079  
1080  
1081

**Supplementary Figure 4. Secondary structure analysis of PfB9.** **a**, Hydrophobic cluster analysis of PfB9. Cluster of hydrophobic amino acids are surrounded. Red stars and black diamond correspond to proline and glycine amino acids respectively. **b**, Secondary structure prediction PfB9 using PSIPRED 4.0. Pink, yellow, and grey background colors indicate predicted helix, strand, and coil structures, respectively. **c**, Intrinsic disorder prediction of PfB9 using IUPred2A. Predictions are based on energy estimation for ordered and disordered residues by IUPred2 (red line) and for disordered binding regions by ANCHOR2 (blue line).



**Fig S5**

**a**

**Molprobrity results**

|                       | PfB9 propeller model | CyRPA           |
|-----------------------|----------------------|-----------------|
| Poor rotamers         | 1/341 (0.29)         | 2/305 (0.66)    |
| Favored rotamers      | 335/341 (97.95)      | 283/305 (92.79) |
| Ramachandran outliers | 4/359 (1.11)         | 0/320 (0.00)    |
| Ramachandran favored  | 330/359 (91.92)      | 307/320 (95.94) |
| Bad bonds             | 5/3121 (0.16)        | 0/2775 (0.00)   |
| Bad angles            | 6/4204 (0.14)        | 0/3744 (0.00)   |

**b**

**Prosa II result**

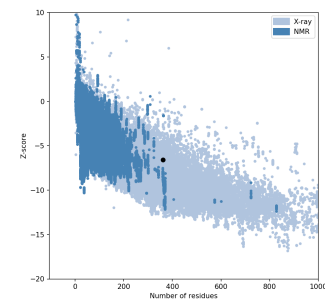

1082  
1083  
1084  
1085  
1086  
1087

**Supplementary Figure 5. Model structure validation.** The structure model of PfB9 propeller (amino acids 26 to 386) was validated using MolProbity (a) and Prosa II (b). For Prosa II, the Z-score of the PfB9 propeller model (indicated as a black point) falls within those of protein structures obtained by X-ray crystallography.

**Fig S6**

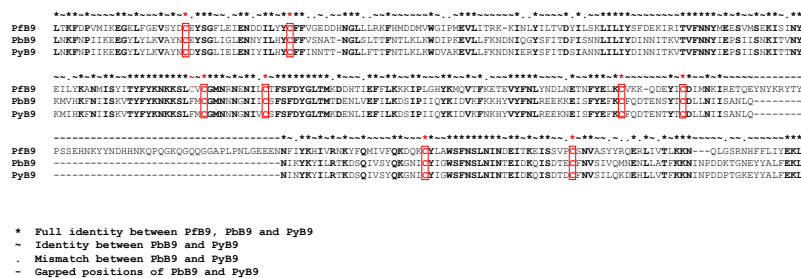

1088  
1089  
1090  
1091  
1092

**Supplementary Figure 6. Protein sequence alignment of the B9 propeller from *P. falciparum*, *P. berghei* and *P. yoelii*.** Conserved residues are in bold, cysteines in red.

**Fig S7**

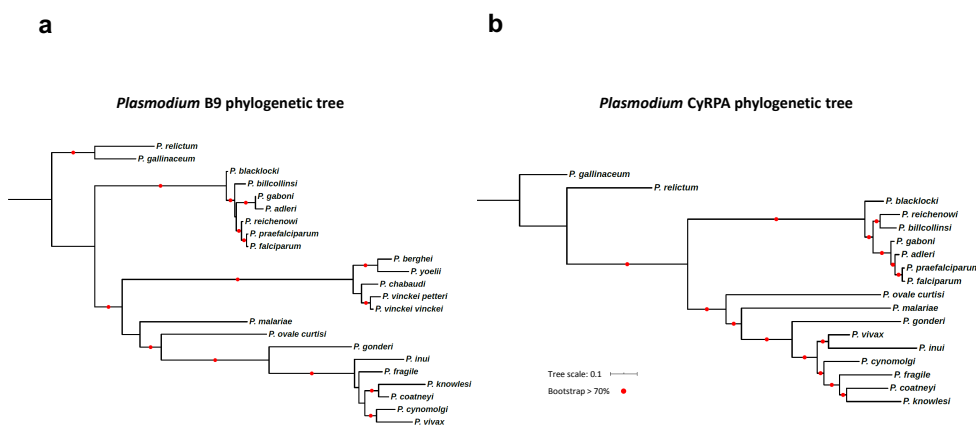

1093  
1094  
1095  
1096  
1097  
1098  
1099

**Supplementary Figure 7. Phylogenetic trees of B9 and CyRPA.** Multiple sequence alignments and corresponding phylogenetic trees were established using two datasets consisting of distinct *Plasmodium* B9 (n = 23) or CyRPA (n = 18) sequences. Phylogenetic trees were inferred by maximum likelihood using PhyML, and branch supports were estimated using the approximate likelihood ratio aLRT SH-like method.

**Fig S8**

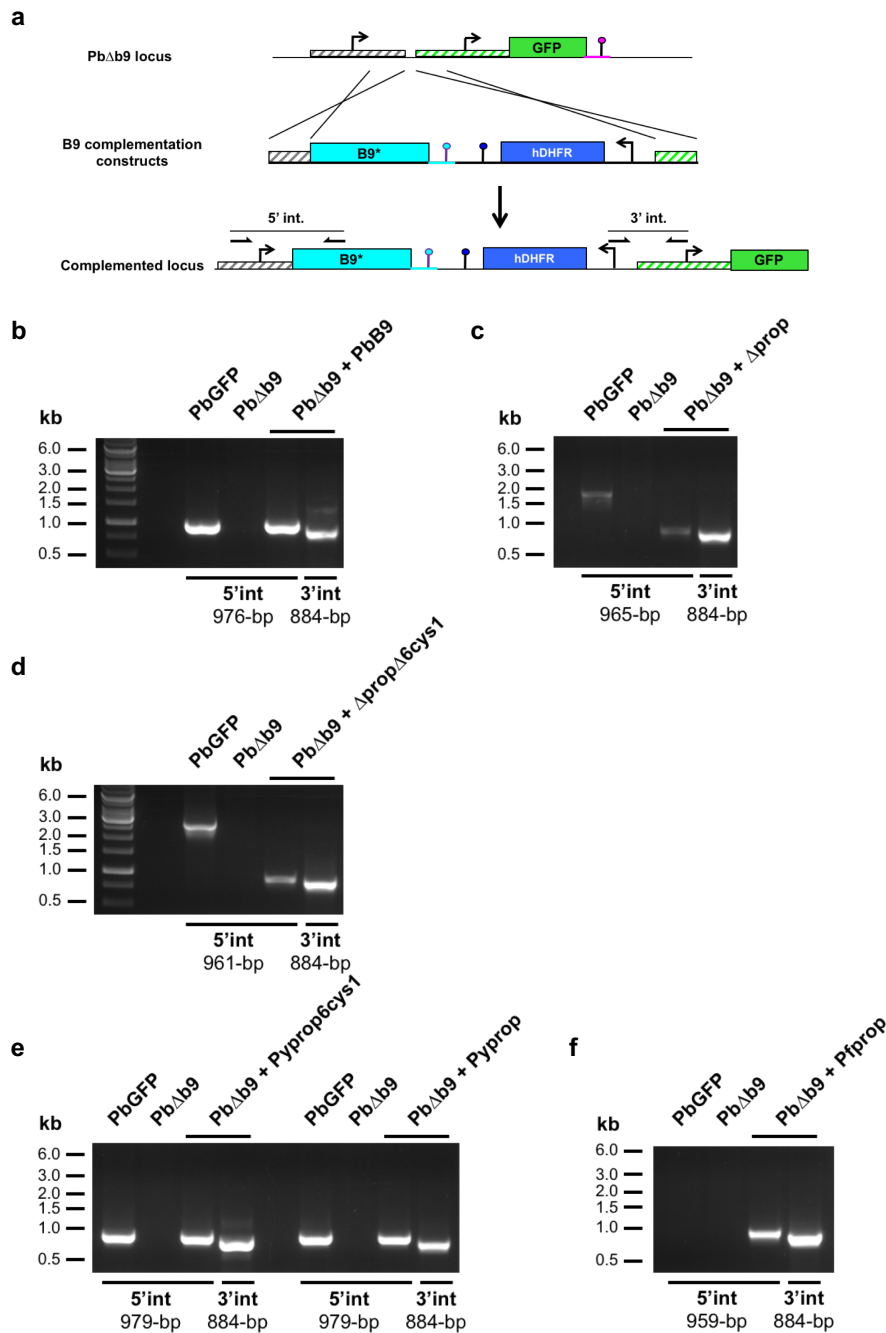

1100  
1101  
1102  
1103  
1104  
1105  
1106  
1107  
1108  
1109

**Supplementary Figure 8. Genetic complementation of *PbΔb9* parasites.** **a**, Strategy used to genetically complement *PbΔb9* with different versions of B9 (indicated as *B9\**) by double crossover homologous recombination. Genotyping primers and expected PCR fragments are indicated by arrows and lines, respectively. **b-f**, Correct construct integration was confirmed by analytical PCR using primers specific for the 5' and 3' recombination events (5' int. and 3' int., respectively) and genomic DNA from *PbGFP*, *PbΔb9*, and *PbΔb9* complemented with the *PbB9* (b),  $\Delta$ prop (c),  $\Delta$ prop $\Delta$ 6cys1 (d), *Pyprop* (e), *Pyprop6cys1* (e) or *Pfprop* (f) constructs.
